# Supplementary material for: Palladium-catalyzed asymmetric addition of diarylphosphines to N-tosylimines
Source: Royal Society of Chemistry journal article supplement (doi:10.1039/c2cc35563a), 2012-01-01
Supplement: c2cc35563a.pdf [file c2cc35563a.pdf]

## Palladium-catalyzed asymmetric addition of diarylphosphines to *N*-tosylimines

Miao Huang,<sup>b</sup> Chun Li,<sup>b</sup> Jiang Huang,<sup>b</sup> Wei-Liang Duan<sup>\*a</sup> and Sheng Xu<sup>b</sup>

<sup>a</sup> State Key Laboratory of Organometallic Chemistry, Shanghai Institute of Organic Chemistry, Chinese Academy of Sciences, 345 Lingling Road, Shanghai 200032, China

<sup>b</sup> School of Chemistry & Molecular Engineering, East China University of Science and Technology, 130 Meilong Road, Shanghai 200237, China

E-mail: wlduan@mail.sioc.ac.cn

### Supporting Information

#### Table of Contents

|                                                |         |
|------------------------------------------------|---------|
| General Methods                                | S2      |
| Experimental Details and Characterization Data | S2–S10  |
| Reference                                      | S10     |
| NMR Spectra                                    | S11–S31 |
| HPLC Charts                                    | S32–S43 |

## General Methods

All air- and moisture-sensitive manipulations were carried out with standard Schlenk techniques under nitrogen or in a glove box under nitrogen.  $^1\text{H}$ ,  $^{13}\text{C}$  and  $^{31}\text{P}$  NMR spectra were recorded on a Varian instrument (400 MHz, 100 MHz and 162 MHz, respectively).  $^1\text{H}$ ,  $^{13}\text{C}$  NMR chemical shifts are reported vs tetramethylsilane signal or residual protio solvent signals.

Toluene,  $\text{Et}_2\text{O}$ , THF, methyl *tert*-butyl ether (MTBE) and hexane were distilled over sodium benzophenone ketyl under nitrogen. Dichloromethane was distilled over  $\text{CaH}_2$  under nitrogen.

The catalysts **4**,<sup>1</sup> diarylphosphines<sup>2</sup> and tosylimines<sup>3</sup> were synthesized following the literature procedures. All other chemicals and solvents were purchased from commercial company and used as received.

## Experimental Details and Characterization Data

### Experimental Procedures for Entry 9, Table 1.

*N*-tosylimine **1a** (51.9 mg, 0.20 mmol) was added to a solution of (*S,S*)-**4** (2.7 mg, 4  $\mu\text{mol}$  Pd) in methyl *tert*-butyl ether (MTBE) (5.0 mL) and the resulting solution was stirred for 15 min at  $-30\text{ }^\circ\text{C}$ , then Diphenylphosphine (39.1 mg, 0.21 mmol) was added to it. The resulting solution was stirred for 4 h at  $-30\text{ }^\circ\text{C}$ , then 10 min at room temperature. The  $\text{S}_8$  (51.9 mg, 0.20 mmol) and THF (2 mL) were added to it, and the resulting mixture was stirred for 6.5 h at room temperature. After evaporated solvent under vacuum, the residue was purified by silica gel chromatography with hexane/EtOAc = 5/1 to afford product as a white solid (86.1 mg, 0.180 mmol; 90% yield).

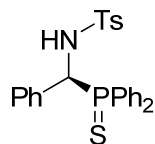

**Entry 9.** White solid. 90% yield. The ee was determined on a Daicel Chiralpak AD-H column with hexane/2-propanol = 80/20, flow = 1.0 mL/min. Retention times: 17.0 min [(*S*)-enantiomer], 29.7 min [(*R*)-enantiomer]. 93% ee.  $[\alpha]_D^{20} = 162$  (c 1.03, CH<sub>2</sub>Cl<sub>2</sub>), The absolute configuration was assigned by analogy with Table 2, entry 4. <sup>1</sup>H NMR (CDCl<sub>3</sub>): δ 8.07 (dd, *J* = 12.1 and 6.8 Hz, 2H), 7.59-7.49 (m, 3H), 7.35-7.30 (m, 5H), 7.16 (td, *J* = 7.6 and 3.2 Hz, 2H), 6.96 (t, *J* = 8.4 Hz, 1H), 6.87-6.76 (m, 6H), 6.05 (dd, *J* = 10.0 and 6.4 Hz, 1H), 5.60 (dd, *J* = 11.6 and 10.4 Hz, 1H), 2.22 (s, 3H). <sup>13</sup>C NMR (CDCl<sub>3</sub>): δ 142.8, 137.3 (d, *J*<sub>CP</sub> = 1.5 Hz), 132.0 (d, *J*<sub>CP</sub> = 3.0 Hz), 131.9 (d, *J*<sub>CP</sub> = 10.4 Hz), 131.75 (d, *J*<sub>CP</sub> = 3.0 Hz), 131.74 (d, *J*<sub>CP</sub> = 8.9 Hz), 129.9 (d, *J*<sub>CP</sub> = 79.6 Hz), 128.94 (d, *J*<sub>CP</sub> = 81.8 Hz), 128.90, 128.8, 128.3 (d, *J*<sub>CP</sub> = 4.5 Hz), 128.0, 127.9, 127.6 (d, *J*<sub>CP</sub> = 3.0 Hz), 127.2 (d, *J*<sub>CP</sub> = 2.2 Hz), 126.8, 55.5 (d, *J*<sub>CP</sub> = 57.3 Hz), 21.2. <sup>31</sup>P{<sup>1</sup>H} NMR (CDCl<sub>3</sub>): δ 51.3 (s). HRMS (MALDI) calcd for C<sub>26</sub>H<sub>24</sub>NO<sub>2</sub>PS<sub>2</sub>Na [M+Na]<sup>+</sup> 500.0878, found 500.0893.

#### Experimental Data for Table 2.

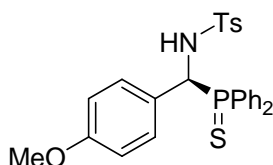

**Entry 2.** White solid. 98% yield. The ee was determined on a Daicel Chiralpak AD-H column with hexane/2-propanol = 80/20, flow = 1.0 mL/min. Retention times: 25.9 min [(*S*)-enantiomer], 48.7 min [(*R*)-enantiomer]. 96% ee.  $[\alpha]_D^{20} = 181$  (c 1.04, CH<sub>2</sub>Cl<sub>2</sub>), The absolute configuration was assigned by analogy with Table 2, entry 4. <sup>1</sup>H NMR (CDCl<sub>3</sub>): δ 8.08-8.02 (m, 2H), 7.59-7.50 (m, 3H), 7.37-7.17 (m, 7H), 6.90 (d, *J* = 8.0 Hz, 2H), 6.70 (dd, *J* = 8.8 and 2.0 Hz, 2H), 6.35 (d, *J* = 8.8 Hz, 2H), 5.94 (dd, *J* = 9.6 and 6.4 Hz, 1H), 5.55 (dd, *J* = 11.2 and 9.6 Hz, 1H), 3.64 (s, 3H), 2.26 (s, 3H). <sup>13</sup>C NMR (CDCl<sub>3</sub>): δ 159.2 (d, *J*<sub>CP</sub> = 3.0 Hz), 142.8, 137.5 (d, *J*<sub>CP</sub> = 1.5 Hz), 132.00 (d, *J*<sub>CP</sub> = 3.0 Hz), 131.9 (d, *J*<sub>CP</sub> = 9.6 Hz), 131.78 (d, *J*<sub>CP</sub> = 9.7 Hz), 131.77 (d, *J*<sub>CP</sub> = 3.0

Hz), 130.14 (d,  $J_{CP} = 78.8$  Hz), 129.6 (d,  $J_{CP} = 7.4$  Hz), 129.15 (d,  $J_{CP} = 82.6$  Hz), 128.94, 128.9 (d,  $J_{CP} = 12.6$  Hz), 128.0 (d,  $J_{CP} = 11.9$  Hz), 126.9, 123.9, 112.8 (d,  $J_{CP} = 2.2$  Hz), 55.09, 55.05 (d,  $J_{CP} = 58.7$  Hz), 21.3.  $^{31}\text{P}\{^1\text{H}\}$  NMR ( $\text{CDCl}_3$ ):  $\delta$  48.9 (s). HRMS (MALDI) calcd for  $\text{C}_{27}\text{H}_{26}\text{NO}_3\text{PS}_2\text{Na}$   $[\text{M}+\text{Na}]^+$  530.0984, found 530.0973.

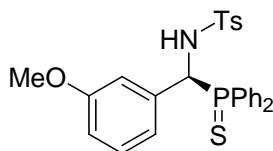

**Entry 3.** White solid. 84% yield. The ee was determined on a Daicel Chiralpak AD-H column with hexane/2-propanol = 80/20, flow = 1.0 mL/min. Retention times: 17.4 min [(*S*)-enantiomer], 30.7 min [(*R*)-enantiomer]. 95% ee.  $[\alpha]_{\text{D}}^{20} = 172$  (c 1.01,  $\text{CH}_2\text{Cl}_2$ ). The absolute configuration was assigned by analogy with Table 2, entry 4.

$^1\text{H}$  NMR ( $\text{CDCl}_3$ ):  $\delta$  8.06 (dd,  $J = 12.0$  and  $6.8$  Hz, 2H), 7.59-7.51 (m, 3H), 7.38-7.32 (m, 5H), 7.19-7.16 (m, 2H), 6.88 (d,  $J = 8.4$  Hz, 2H), 6.72 (t,  $J = 8.4$  Hz, 1H), 6.51 (d,  $J = 7.6$  Hz, 1H), 6.33-6.30 (m, 2H), 6.04 (dd,  $J = 9.6$  and  $6.4$  Hz, 1H), 5.58 (t,  $J = 10.8$  Hz, 1H), 3.46 (s, 3H), 2.24 (s, 3H).  $^{13}\text{C}$  NMR ( $\text{CDCl}_3$ ):  $\delta$  158.5 (d,  $J_{CP} = 2.2$  Hz), 142.9, 137.3 (d,  $J_{CP} = 1.5$  Hz), 133.1, 132.0 (d,  $J_{CP} = 3.8$  Hz), 131.9 (d,  $J_{CP} = 9.6$  Hz), 131.8 (d,  $J_{CP} = 3.0$  Hz), 131.7 (d,  $J_{CP} = 8.9$  Hz), 130.0 (d,  $J_{CP} = 79.6$  Hz), 129.0 (d,  $J_{CP} = 81.8$  Hz), 128.9, 128.85 (d,  $J_{CP} = 11.9$  Hz), 128.2 (d,  $J_{CP} = 2.2$  Hz), 127.9 (d,  $J_{CP} = 12.7$  Hz), 126.8, 121.1 (d,  $J_{CP} = 5.2$  Hz), 114.3 (d,  $J_{CP} = 2.9$  Hz), 112.9 (d,  $J_{CP} = 3.7$  Hz), 55.5 (d,  $J_{CP} = 57.2$  Hz), 54.8, 21.2.  $^{31}\text{P}\{^1\text{H}\}$  NMR ( $\text{CDCl}_3$ ):  $\delta$  51.2 (s). HRMS (MALDI) calcd for  $\text{C}_{27}\text{H}_{26}\text{NO}_3\text{PS}_2\text{Na}$   $[\text{M}+\text{Na}]^+$  530.0984, found 530.0971.

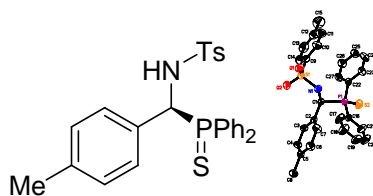

**Entry 4.** White solid. 93% yield. The ee was determined on a Daicel Chiralpak AD-H column with hexane/2-propanol = 80/20, flow = 1.0 mL/min. Retention times: 21.8 min [(*S*)-enantiomer], 37.8 min [(*R*)-enantiomer]. 94% ee.  $[\alpha]_{\text{D}}^{20} = 165$  (c 1.11,

CH<sub>2</sub>Cl<sub>2</sub>), The absolute configuration was determined to be *S* by the X-ray crystal diffraction analysis of the product.

<sup>1</sup>H NMR (CDCl<sub>3</sub>): δ 8.05 (dd, *J* = 12.8 and 7.6 Hz, 2H), 7.58-7.50 (m, 3H), 7.39-7.16 (m, 7H), 6.87 (d, *J* = 8.0 Hz, 2H), 6.64 (q, *J* = 8.0 Hz, 4H), 5.95 (dd, *J* = 10.0 and 6.4 Hz, 1H), 5.57 (t, *J* = 10.4 Hz, 1H), 2.25 (s, 3H), 2.13 (s, 3H). <sup>13</sup>C NMR (CDCl<sub>3</sub>): δ 142.8, 137.5 (d, *J*<sub>CP</sub> = 3.0 Hz), 137.4 (d, *J*<sub>CP</sub> = 2.2 Hz), 132.0 (d, *J*<sub>CP</sub> = 2.9 Hz), 131.9 (d, *J*<sub>CP</sub> = 1.5 Hz), 131.8 (d, *J*<sub>CP</sub> = 8.9 Hz), 131.7 (d, *J*<sub>CP</sub> = 3.0 Hz), 130.1 (d, *J*<sub>CP</sub> = 79.5 Hz), 129.1 (d, *J*<sub>CP</sub> = 82.6 Hz), 128.9, 128.8 (d, *J*<sub>CP</sub> = 11.9 Hz), 128.7, 128.3 (d, *J*<sub>CP</sub> = 4.4 Hz), 128.0 (d, *J*<sub>CP</sub> = 6.7 Hz), 127.9 (d, *J*<sub>CP</sub> = 8.1 Hz), 126.8, 55.4 (d, *J*<sub>CP</sub> = 58.1 Hz), 21.3, 20.9. <sup>31</sup>P{<sup>1</sup>H} NMR (CDCl<sub>3</sub>): δ 50.9 (s). HRMS (MALDI) calcd for C<sub>27</sub>H<sub>26</sub>NO<sub>2</sub>PS<sub>2</sub>Na [M+Na]<sup>+</sup> 514.1035, found 514.1054.

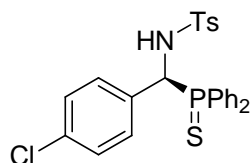

**Entry 5.** White solid. 99% yield. The ee was determined on a Daicel Chiralpak AD-H column with hexane/2-propanol = 80/20, flow = 1.0 mL/min. Retention times: 22.9 min [(*S*)-enantiomer], 58.0 min [(*R*)-enantiomer]. 86% ee. [ $\alpha$ ]<sup>20</sup><sub>D</sub> = 179 (c 1.11, CH<sub>2</sub>Cl<sub>2</sub>), The absolute configuration was assigned by analogy with Table 2, entry 4.

<sup>1</sup>H NMR (CDCl<sub>3</sub>): δ 8.07-8.02 (m, 2H), 7.61-7.19 (m, 10H), 6.92 (d, *J* = 8.0 Hz, 2H), 6.78 (d, *J* = 8.4 Hz, 2H), 6.69 (dd, *J* = 8.8 and 2.0 Hz, 2H), 5.97 (dd, *J* = 9.6 and 6.4 Hz, 1H), 5.56 (dd, *J* = 12.0 and 10.4 Hz, 1H), 2.29 (s, 3H). <sup>13</sup>C NMR (CDCl<sub>3</sub>): δ 143.4, 137.2 (d, *J*<sub>CP</sub> = 1.5 Hz), 133.9 (d, *J*<sub>CP</sub> = 3.0 Hz), 132.2 (d, *J*<sub>CP</sub> = 3.0 Hz), 132.1 (d, *J*<sub>CP</sub> = 3.0 Hz), 131.9 (d, *J*<sub>CP</sub> = 10.4 Hz), 131.7 (d, *J*<sub>CP</sub> = 9.7 Hz), 130.5, 129.8 (d, *J*<sub>CP</sub> = 79.6 Hz), 129.6 (d, *J*<sub>CP</sub> = 4.4 Hz), 129.1, 129.0 (d, *J*<sub>CP</sub> = 11.9 Hz), 128.7 (d, *J*<sub>CP</sub> = 82.6 Hz), 128.2 (d, *J*<sub>CP</sub> = 12.6 Hz), 127.4 (d, *J*<sub>CP</sub> = 2.2 Hz), 126.8, 54.9 (d, *J*<sub>CP</sub> = 57.3 Hz), 21.3. <sup>31</sup>P{<sup>1</sup>H} NMR (CDCl<sub>3</sub>): δ 50.9 (s). HRMS (MALDI) calcd for C<sub>26</sub>H<sub>23</sub>NO<sub>2</sub>PS<sub>2</sub>ClNa [M+Na]<sup>+</sup> 534.0489, found 534.0490.

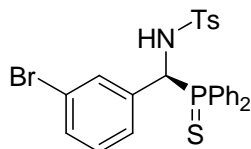

**Entry 6.** White solid. 89% yield. The ee was determined on a Daicel Chiralpak AD-H column with hexane/2-propanol = 80/20, flow = 1.0 mL/min. Retention times: 12.2 min [(*S*)-enantiomer], 22.1 min [(*R*)-enantiomer]. 78% ee.  $[\alpha]_D^{20} = 128$  (c 1.14, CH<sub>2</sub>Cl<sub>2</sub>), The absolute configuration was assigned by analogy with Table 2, entry 4.

<sup>1</sup>H NMR (CDCl<sub>3</sub>): δ 8.05 (dd, *J* = 12.4 and 7.2 Hz, 2H), 7.61-7.19 (m, 10H), 7.08 (d, *J* = 6.8 Hz, 1H), 6.93 (d, *J* = 8.0 Hz, 2H), 6.79, 6.68-6.63 (m, 2H), 5.98 (dd, *J* = 9.6 and 7.2 Hz, 1H), 5.52 (t, *J* = 10.8 Hz, 1H), 2.28 (s, 3H). <sup>13</sup>C NMR (CDCl<sub>3</sub>): δ 143.3, 137.0 (d, *J*<sub>CP</sub> = 1.5 Hz), 133.9, 132.2 (d, *J*<sub>CP</sub> = 3.0 Hz), 132.1 (d, *J*<sub>CP</sub> = 3.0 Hz), 131.9 (d, *J*<sub>CP</sub> = 9.7 Hz), 131.7 (d, *J*<sub>CP</sub> = 9.7 Hz), 131.3 (d, *J*<sub>CP</sub> = 3.8 Hz), 130.5 (d, *J*<sub>CP</sub> = 3.0 Hz), 129.6 (d, *J*<sub>CP</sub> = 81.1 Hz), 129.1, 129.0 (d, *J*<sub>CP</sub> = 11.9 Hz), 128.6 (d, *J*<sub>CP</sub> = 2.2 Hz), 128.5 (d, *J*<sub>CP</sub> = 82.6 Hz), 128.1 (d, *J*<sub>CP</sub> = 12.7 Hz), 126.9 (d, *J*<sub>CP</sub> = 5.2 Hz), 126.7, 121.4 (d, *J*<sub>CP</sub> = 3.0 Hz), 55.0 (d, *J*<sub>CP</sub> = 55.6 Hz), 21.3. <sup>31</sup>P {<sup>1</sup>H} NMR (CDCl<sub>3</sub>): δ 51.2 (s). HRMS (MALDI) calcd for C<sub>26</sub>H<sub>23</sub>NO<sub>2</sub>BrPS<sub>2</sub>Na [M+Na]<sup>+</sup> 577.9983, found 577.9987.

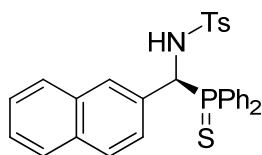

**Entry 7.** White solid. 86% yield. The ee was determined on a Daicel Chiralpak AD-H column with hexane/2-propanol = 80/20, flow = 1.0 mL/min. Retention times: 21.1 min [(*S*)-enantiomer], 38.9 min [(*R*)-enantiomer]. 85% ee.  $[\alpha]_D^{20} = 155$  (c 1.07, CH<sub>2</sub>Cl<sub>2</sub>), The absolute configuration was assigned by analogy with Table 2, entry 4.

<sup>1</sup>H NMR (CDCl<sub>3</sub>): δ 8.13-8.08 (m, 2H), 7.61-7.54 (m, 4H), 7.42-7.23 (m, 9H), 7.18 (s, 1H), 7.10 (td, *J* = 7.6 and 2.8 Hz, 2H), 6.83 (d, *J* = 8.4 Hz, 1H), 6.59 (d, *J* = 8.0 Hz, 2H), 6.10 (dd, *J* = 10.0 and 6.4 Hz, 1H), 5.75 (t, *J* = 11.6 and 10.4 Hz, 1H), 1.89 (s, 3H). <sup>13</sup>C NMR (CDCl<sub>3</sub>): δ 143.0, 137.3 (d, *J*<sub>CP</sub> = 1.5 Hz), 132.5 (d, *J*<sub>CP</sub> = 2.2 Hz), 132.2 (d, *J*<sub>CP</sub> = 2.2 Hz), 132.1 (d, *J*<sub>CP</sub> = 3.0 Hz), 132.0 (d, *J*<sub>CP</sub> = 9.7 Hz), 131.9, 131.8

(d,  $J_{CP} = 9.7$  Hz), 130.3 (d,  $J_{CP} = 79.6$  Hz), 129.0, 128.90 (d,  $J_{CP} = 82.5$  Hz), 128.86 (d,  $J_{CP} = 6.0$  Hz), 128.7, 128.4 (d,  $J_{CP} = 5.9$  Hz), 128.0 (d,  $J_{CP} = 11.9$  Hz), 127.8 (d,  $J_{CP} = 1.5$  Hz), 127.2 (d,  $J_{CP} = 1.4$  Hz), 126.9 (d,  $J_{CP} = 1.5$  Hz), 126.7, 126.1, 125.8, 125.7 (d,  $J_{CP} = 3.0$  Hz), 55.8 (d,  $J_{CP} = 57.3$  Hz), 20.9.  $^{31}\text{P}\{^1\text{H}\}$  NMR ( $\text{CDCl}_3$ ):  $\delta$  50.7 (s). HRMS (MALDI) calcd for  $\text{C}_{26}\text{H}_{23}\text{NO}_2\text{BrPS}_2\text{Na}$   $[\text{M}+\text{Na}]^+$  577.9983, found 577.9987.

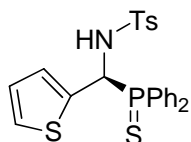

**Entry 8.** White solid. 90% yield. The ee was determined on a Daicel Chiralpak IC column with hexane/2-propanol = 80/20, flow = 1.0 mL/min. Retention times: 21.8 min [(*S*)-enantiomer], 25.8 min [(*R*)-enantiomer]. 91% ee.  $[\alpha]_{\text{D}}^{20} = 114$  (c 1.00,  $\text{CH}_2\text{Cl}_2$ ), the absolute configuration was assigned by analogy with Table 2, entry 4.

$^1\text{H}$  NMR ( $\text{CDCl}_3$ ):  $\delta$  8.08-8.01 (m, 2H), 7.60-7.47 (m, 5H), 7.39-7.23 (m, 5H), 6.97 (d,  $J = 8.4$  Hz, 2H), 6.91 (dt,  $J = 5.2$  and 1.2 Hz, 1H), 6.56-6.54 (m, 1H), 6.51 (dd,  $J = 4.8$  and 4.0 Hz, 1H), 5.91 (q,  $J = 10.4$  Hz, 1H), 5.90-8.83 (m, 1H), 2.29 (s, 3H).  $^{13}\text{C}$  NMR ( $\text{CDCl}_3$ ):  $\delta$  142.9, 137.3 (d,  $J_{CP} = 1.1$  Hz), 134.9, 132.0 (d,  $J_{CP} = 2.9$  Hz), 131.9 (d,  $J_{CP} = 3.5$  Hz), 131.8 (d,  $J_{CP} = 7.0$  Hz), 131.6 (d,  $J_{CP} = 7.0$  Hz), 129.8 (d,  $J_{CP} = 72.2$  Hz), 129.0, 128.8 (d,  $J_{CP} = 12.2$  Hz), 128.6 (d,  $J_{CP} = 75.1$  Hz), 128.07 (d,  $J_{CP} = 12.8$  Hz), 128.06, 126.7, 126.3 (d,  $J_{CP} = 2.9$  Hz), 125.85 (d,  $J_{CP} = 2.3$  Hz), 52.2 (d,  $J_{CP} = 62.8$  Hz), 21.3.  $^{31}\text{P}\{^1\text{H}\}$  NMR ( $\text{CDCl}_3$ ):  $\delta$  51.7 (s). HRMS (ESI) calcd for  $\text{C}_{24}\text{H}_{22}\text{NO}_2\text{PS}_3\text{Na}$   $[\text{M}+\text{Na}]^+$  483.0550, found 483.0560.

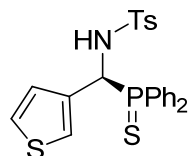

**Entry 9.** White solid. 95% yield. The ee was determined on a Daicel Chiralpak AD-H column with hexane/2-propanol = 80/20, flow = 1.0 mL/min. Retention times: 20.3 min [(*S*)-enantiomer], 26.5 min [(*R*)-enantiomer]. 86% ee.  $[\alpha]_{\text{D}}^{20} = 122$  (c 1.01,  $\text{CH}_2\text{Cl}_2$ ), the absolute configuration was assigned by analogy with Table 2, entry 4.

$^1\text{H}$  NMR ( $\text{CDCl}_3$ ):  $\delta$  8.01 (dd,  $J = 12.4$  and  $7.2$  Hz, 2H), 7.58-7.51 (m, 3H), 7.43-7.34 (m, 5H), 7.24-7.18 (m, 2H), 6.91 (d,  $J = 8.0$  Hz, 2H), 6.76 (dd,  $J = 4.8$  and  $3.2$  Hz, 1H), 6.66 (s, 1H), 6.55 (d,  $J = 4.8$  Hz, 1H), 6.93-5.88 (m, 1H), 5.77 (t,  $J = 10.4$  Hz, 1H), 2.27 (s, 3H).  $^{13}\text{C}$  NMR ( $\text{CDCl}_3$ ):  $\delta$  142.8, 137.3 (d,  $J_{\text{CP}} = 1.5$  Hz), 132.8 (d,  $J_{\text{CP}} = 0.8$  Hz), 131.9 (d,  $J_{\text{CP}} = 2.9$  Hz), 131.8, 131.7 (d,  $J_{\text{CP}} = 9.7$  Hz), 131.6 (d,  $J_{\text{CP}} = 10.1$  Hz), 129.9 (d,  $J_{\text{CP}} = 79.1$  Hz), 129.0 (d,  $J_{\text{CP}} = 83.6$  Hz), 128.9, 128.7 (d,  $J_{\text{CP}} = 11.2$  Hz), 128.0 (d,  $J_{\text{CP}} = 12.2$  Hz), 126.8 (d,  $J_{\text{CP}} = 3.0$  Hz), 126.6, 124.4 (d,  $J_{\text{CP}} = 1.4$  Hz), 124.3 (d,  $J_{\text{CP}} = 7.0$  Hz), 52.1 (d,  $J_{\text{CP}} = 60.6$  Hz), 21.3.  $^{31}\text{P}\{^1\text{H}\}$  NMR ( $\text{CDCl}_3$ ):  $\delta$  50.2 (s).

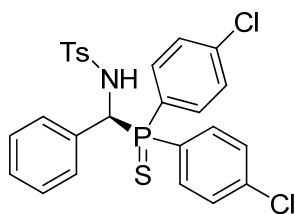

**Entry 10.** White solid. 97% yield. The ee was determined on a Daicel Chiralpak AD-H column with hexane/2-propanol = 80/20, flow = 1.0 mL/min. Retention times: 11.5 min [(*S*)-enantiomer], 32.7 min [(*R*)-enantiomer]. 86% ee.  $[\alpha]_{\text{D}}^{20} = 158$  (c 1.03,  $\text{CH}_2\text{Cl}_2$ ), The absolute configuration was assigned by analogy with Table 2, entry 4.

$^1\text{H}$  NMR ( $\text{CDCl}_3$ ):  $\delta$  7.98 (dd,  $J = 12.0$  and  $8.4$  Hz, 2H), 7.48 (dd,  $J = 8.4$  and  $2.4$  Hz, 2H), 7.31 (d,  $J = 8.4$  Hz, 2H), 7.24-7.21 (m, 2H), 7.18 (s, 1H), 7.16 (dd,  $J = 8.4$  and  $2.4$  Hz, 2H), 7.02 (t,  $J = 6.8$  Hz, 1H), 6.89-6.79 (m, 6H), 6.03-5.99 (m, 1H), 5.56 (t,  $J = 11.2$  Hz, 1H), 2.25 (s, 3H).  $^{13}\text{C}$  NMR ( $\text{CDCl}_3$ ):  $\delta$  143.2, 139.0 (d,  $J_{\text{CP}} = 3.0$  Hz), 138.8 (d,  $J_{\text{CP}} = 3.7$  Hz), 137.1 (d,  $J_{\text{CP}} = 1.5$  Hz), 133.22 (d,  $J_{\text{CP}} = 10.5$  Hz), 133.20 (d,  $J_{\text{CP}} = 10.4$  Hz), 131.5, 129.3 (d,  $J_{\text{CP}} = 12.6$  Hz), 129.0, 128.4 (d,  $J_{\text{CP}} = 6.4$  Hz), 128.3, 128.2 (d,  $J_{\text{CP}} = 57.2$  Hz), 128.0 (d,  $J_{\text{CP}} = 2.9$  Hz), 127.5 (d,  $J_{\text{CP}} = 2.9$  Hz), 127.4 (d,  $J_{\text{CP}} = 59.5$  Hz), 126.8, 55.7 (d,  $J_{\text{CP}} = 58.7$  Hz), 21.3.  $^{31}\text{P}\{^1\text{H}\}$  NMR ( $\text{CDCl}_3$ ):  $\delta$  49.9 (s). HRMS (MALDI) calcd for  $\text{C}_{26}\text{H}_{22}\text{NO}_2\text{PS}_2\text{Cl}_2\text{Na}$   $[\text{M}+\text{Na}]^+$  568.0099, found 568.0093.



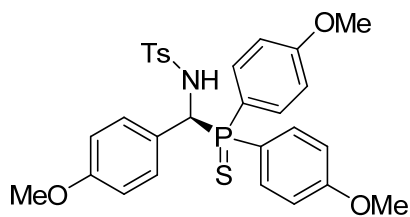

**Entry 11.** White solid. 89% yield. The ee was determined on a Daicel Chiralpak AD-H column with hexane/2-propanol = 70/30, flow = 1.0 mL/min. Retention times: 19.5 min [(*S*)-enantiomer], 34.7 min [(*R*)-enantiomer]. 84% ee.  $[\alpha]_D^{20} = 158$  (c 1.04, CH<sub>2</sub>Cl<sub>2</sub>), The absolute configuration was assigned by analogy with Table 2, entry 4.

<sup>1</sup>H NMR (CDCl<sub>3</sub>): δ 7.94 (dd, *J* = 11.6 and 8.4 Hz, 2H), 7.30 (d, *J* = 8.4 Hz, 2H), 7.24 (dd, *J* = 12.4 and 8.4 Hz, 2H), 7.01 (dd, *J* = 8.8 and 2.4 Hz, 2H), 6.91 (d, *J* = 8.0 Hz, 2H), 6.73 (dd, *J* = 8.8 and 2.8 Hz, 2H), 6.69 (dd, *J* = 8.8 and 2.4 Hz, 2H), 6.39 (d, *J* = 8.4 Hz, 2H), 5.95-5.91 (m, 1H), 5.43 (dd, *J* = 11.2 and 10.4 Hz, 1H), 3.87 (s, 3H), 3.73 (s, 3H), 3.66 (s, 3H), 2.27 (s, 3H). <sup>13</sup>C NMR (CDCl<sub>3</sub>): δ 162.5 (d, *J*<sub>CP</sub> = 3.1 Hz), 162.3 (d, *J*<sub>CP</sub> = 3.1 Hz), 159.2 (d, *J*<sub>CP</sub> = 2.7 Hz), 142.7, 137.6 (d, *J*<sub>CP</sub> = 1.5 Hz), 133.9 (d, *J*<sub>CP</sub> = 11.6 Hz), 133.6 (d, *J*<sub>CP</sub> = 10.8 Hz), 129.6 (d, *J*<sub>CP</sub> = 4.7 Hz), 128.9, 126.9, 124.3, 120.9 (d, *J*<sub>CP</sub> = 12.6 Hz), 120.5 (d, *J*<sub>CP</sub> = 89.4 Hz), 114.4 (d, *J*<sub>CP</sub> = 13.2 Hz), 113.5 (d, *J*<sub>CP</sub> = 13.6 Hz), 112.8 (d, *J*<sub>CP</sub> = 2.3 Hz), 55.5 (d, *J*<sub>CP</sub> = 58.8 Hz), 55.4, 55.3, 55.1, 21.3 (d, *J*<sub>CP</sub> = 2.4 Hz). <sup>31</sup>P{<sup>1</sup>H} NMR (CDCl<sub>3</sub>): δ 49.6 (s). HRMS (MALDI) calcd for C<sub>29</sub>H<sub>30</sub>NO<sub>5</sub>PS<sub>2</sub>Na [M+Na]<sup>+</sup> 590.1195, found 590.1176.

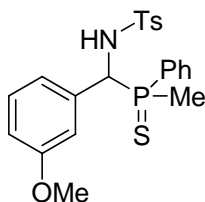

**Entry 12.** White solid. 96% yield. dr = 1 : 0.9.

Major diastereomer: <sup>1</sup>H NMR (CDCl<sub>3</sub>): δ 7.52 (dd, *J* = 12.6 and 7.8 Hz, 2H), 7.44-7.30 (m, 5H), 6.97 (d, *J* = 7.8 Hz, 2H), 6.73 (t, *J* = 7.8, 1H), 6.50 (d, *J* = 8.4 Hz, 1H), 6.22 (d, *J* = 7.5 Hz, 1H), 6.15-6.09 (m, 2H), 4.90 (t, *J* = 9.9 Hz, 1H), 3.44 (s, 3H), 2.26 (s, 3H), 2.22 (d, *J* = 6.9 Hz, 3H). <sup>31</sup>P{<sup>1</sup>H} NMR (CDCl<sub>3</sub>): δ 50.3 (s).

Minor diastereomer:  $^1\text{H}$  NMR ( $\text{CDCl}_3$ ):  $\delta$  7.82 (dd,  $J = 12.9$  and  $7.5$  Hz, 2H), 7.57-7.43 (m, 3H), 7.31 (d,  $J = 8.1$  Hz, 2H), 7.10 (t,  $J = 8.1$ , 1H), 6.93 (d,  $J = 8.1$  Hz, 2H), 6.76-6.71 (m, 1H), 6.67 (s, 1H), 5.96 (t,  $J = 8.1$  Hz, 1H), 4.82 (t,  $J = 11.7$  and  $9.0$  Hz, 1H), 3.66 (s, 3H), 2.29 (s, 3H), 1.64 (d,  $J = 12.9$  Hz, 3H).  $^{31}\text{P}\{^1\text{H}\}$  NMR ( $\text{CDCl}_3$ ):  $\delta$  48.7 (s).

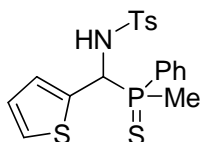

**Entry 13.** White solid. 87% yield. dr = 1.5:1. The ee of the minor diastereomer was determined on a Daicel Chiralpak AD-H column with hexane/2-propanol = 80/20, flow = 1.0 mL/min. Retention times: 12.1 min, 13.8 min. 16% ee.

Major diastereomer:  $^1\text{H}$  NMR ( $\text{CDCl}_3$ ):  $\delta$  7.86 (dd,  $J = 12.6$  and  $8.1$  Hz, 2H), 7.57-7.46 (m, 3H), 7.33 (d,  $J = 8.1$  Hz, 2H), 7.16 (t,  $J = 5.1$ , 1H), 6.98 (d,  $J = 7.8$  Hz, 2H), 6.86-6.82 (m, 1H), 6.82 (t,  $J = 4.8$  Hz, 1H), 5.76 (dd,  $J = 9.0$  and  $6.3$  Hz, 1H), 5.21 (dd,  $J = 11.1$  and  $9.6$  Hz, 1H), 2.31 (s, 3H), 1.75 (d,  $J = 12.9$  Hz, 3H).  $^{31}\text{P}\{^1\text{H}\}$  NMR ( $\text{CDCl}_3$ ):  $\delta$  49.0 (s).

Minor diastereomer:  $^1\text{H}$  NMR ( $\text{CDCl}_3$ ):  $\delta$  7.64 (dd,  $J = 8.4$  and  $7.2$  Hz, 2H), 7.60-7.33 (m, 5H), 7.04 (d,  $J = 8.1$  Hz, 2H), 6.87 (t,  $J = 5.1$ , 1H), 6.49 (d,  $J = 3.9$  Hz, 1H), 6.40-6.37 (m, 1H), 5.95 (dd,  $J = 9.9$  and  $4.5$  Hz, 1H), 5.28 (t,  $J = 11.5$  Hz, 1H), 2.29 (s, 3H), 2.24 (d,  $J = 12.6$  Hz, 3H).  $^{31}\text{P}\{^1\text{H}\}$  NMR ( $\text{CDCl}_3$ ):  $\delta$  50.5 (s). HRMS (ESI) calcd for  $\text{C}_{19}\text{H}_{20}\text{NO}_2\text{PS}_3\text{Na}$   $[\text{M}+\text{Na}]^+$  421.0394, found 421.0406.

## References:

- (1) Feng, J.-J.; Chen, X.-F.; Shi, M.; Duan, W.-L. *J. Am. Chem. Soc.* **2010**, *132*, 5562.
- (2) Herseczki, Z.; Gergely, I.; Hegedüs, C.; Szöllösy, A.; Bakos, J. *Tetrahedron: Asymmetry* **2004**, *15*, 1673.
- (3) Fan, R.; Pu, Do., Qin, L., Wen, F., Yao, G., Wu, J. *J. Org. Chem.* **2007**, *72*, 3149.

### NMR Spectra

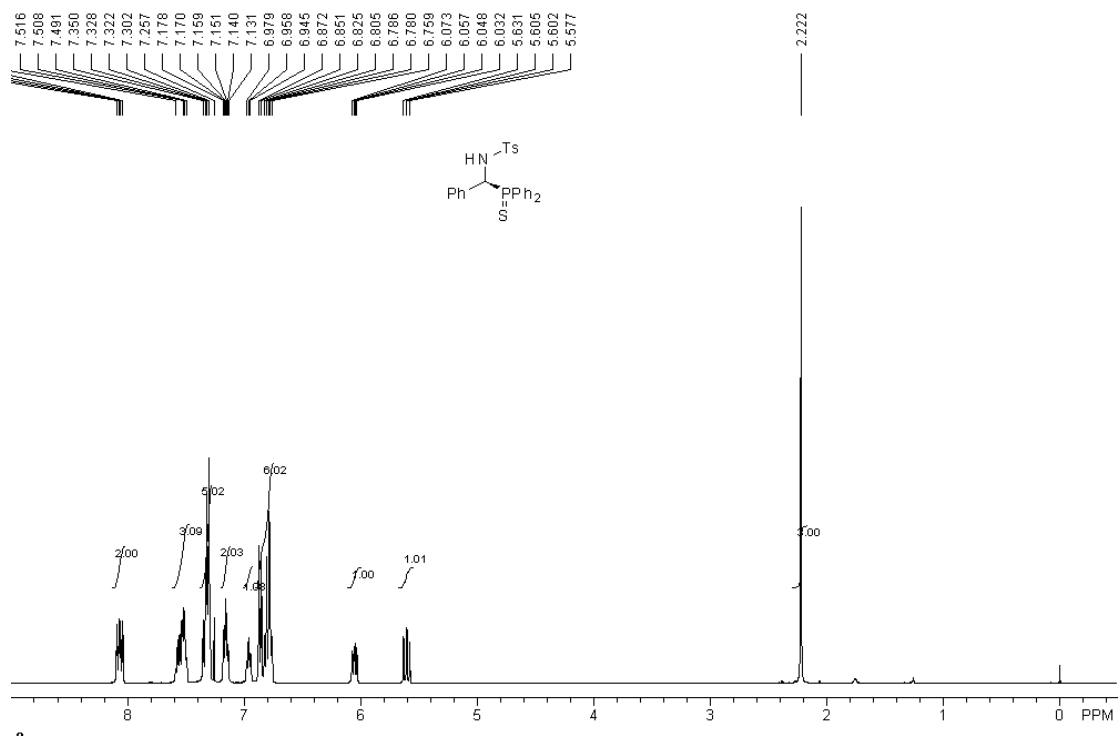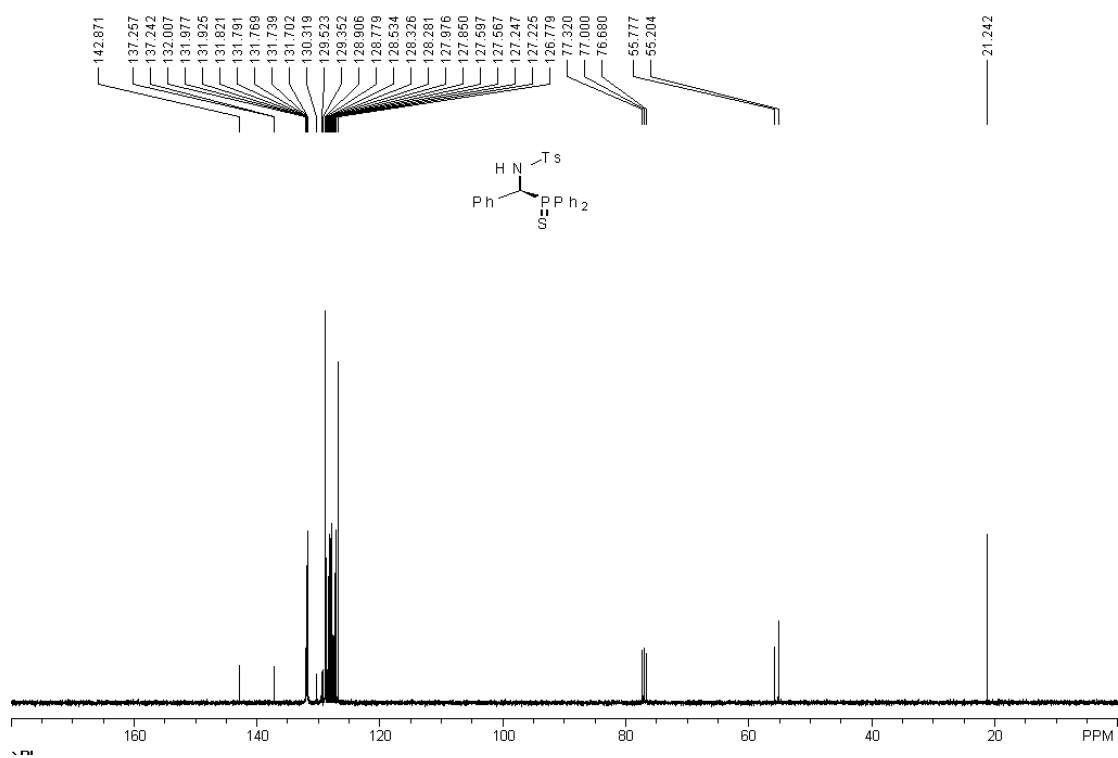

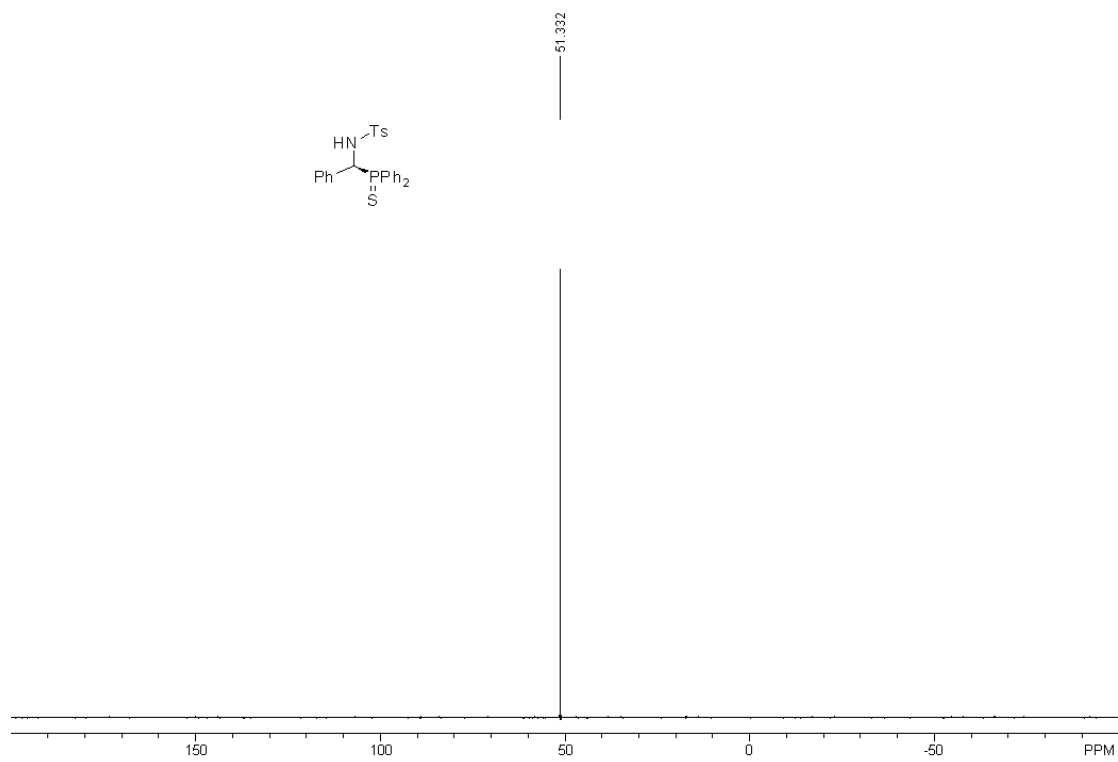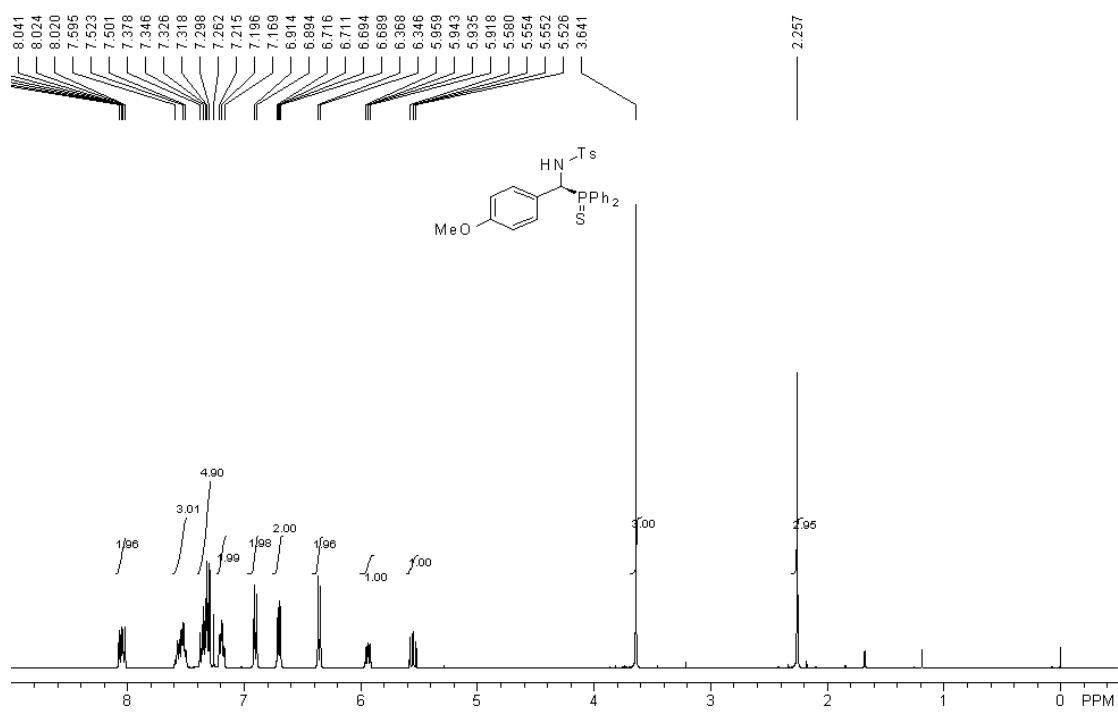

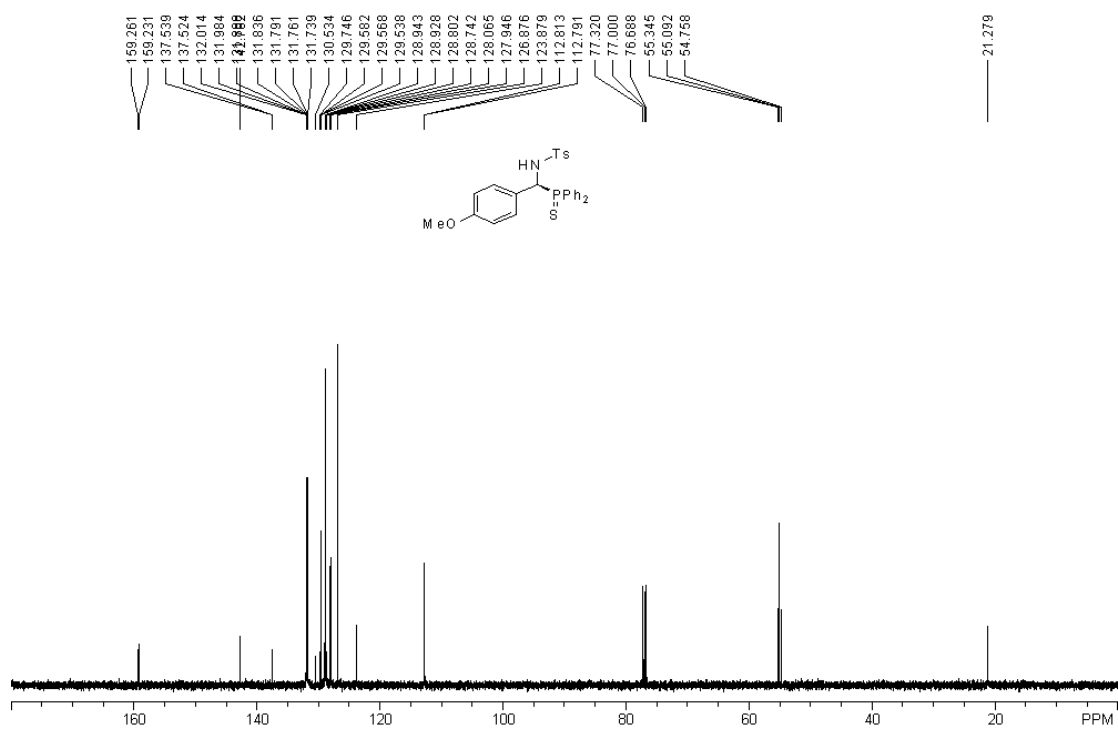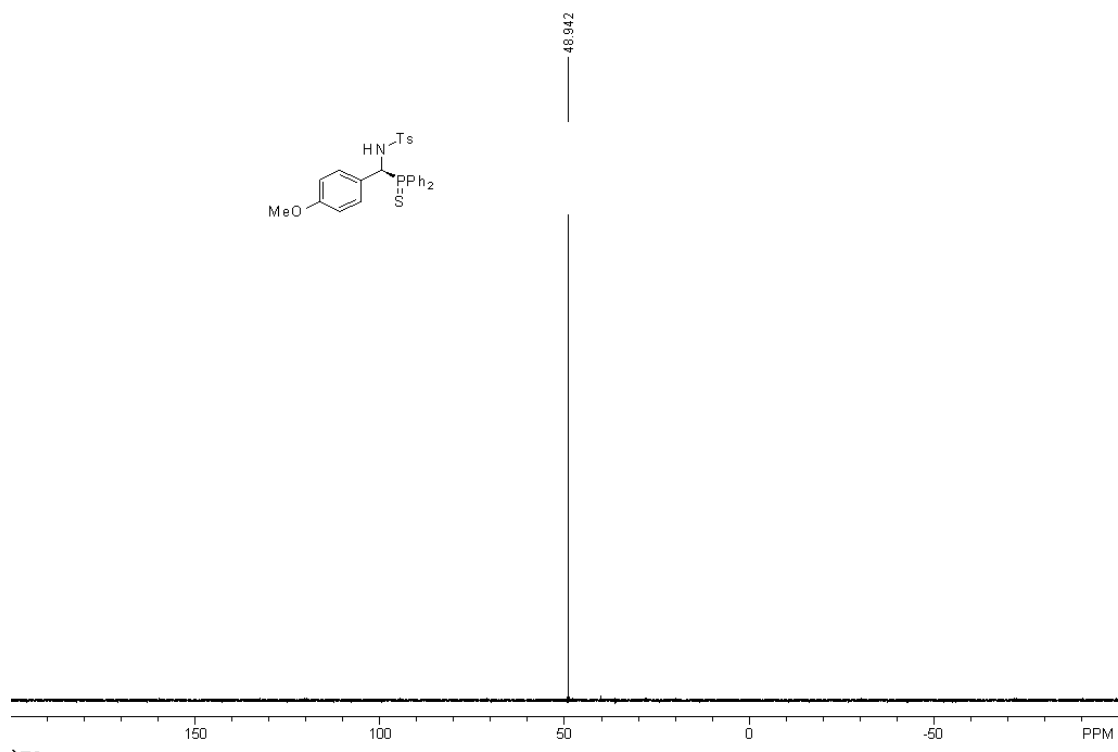

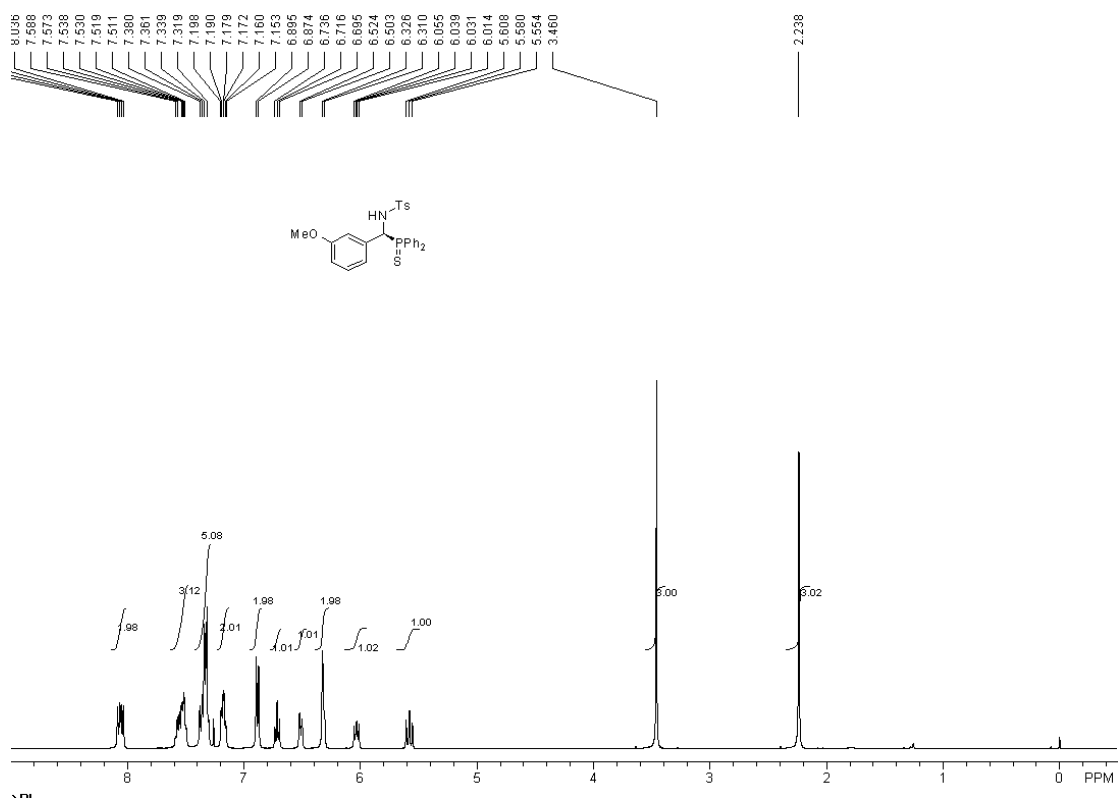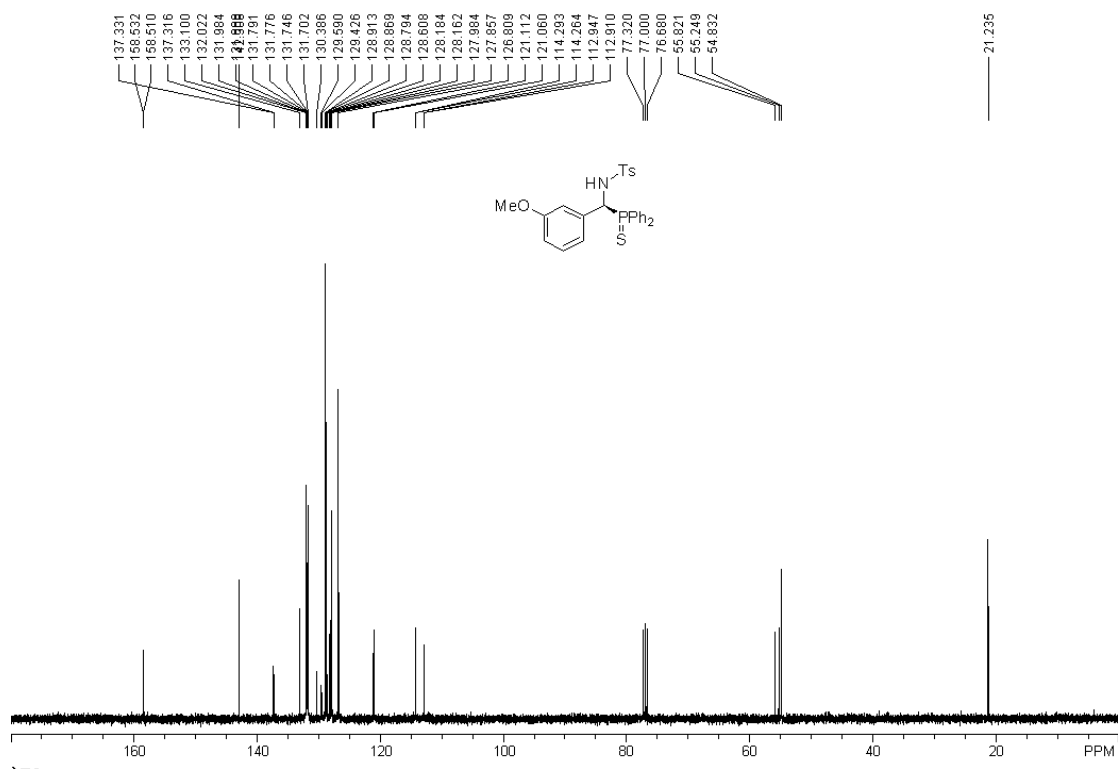

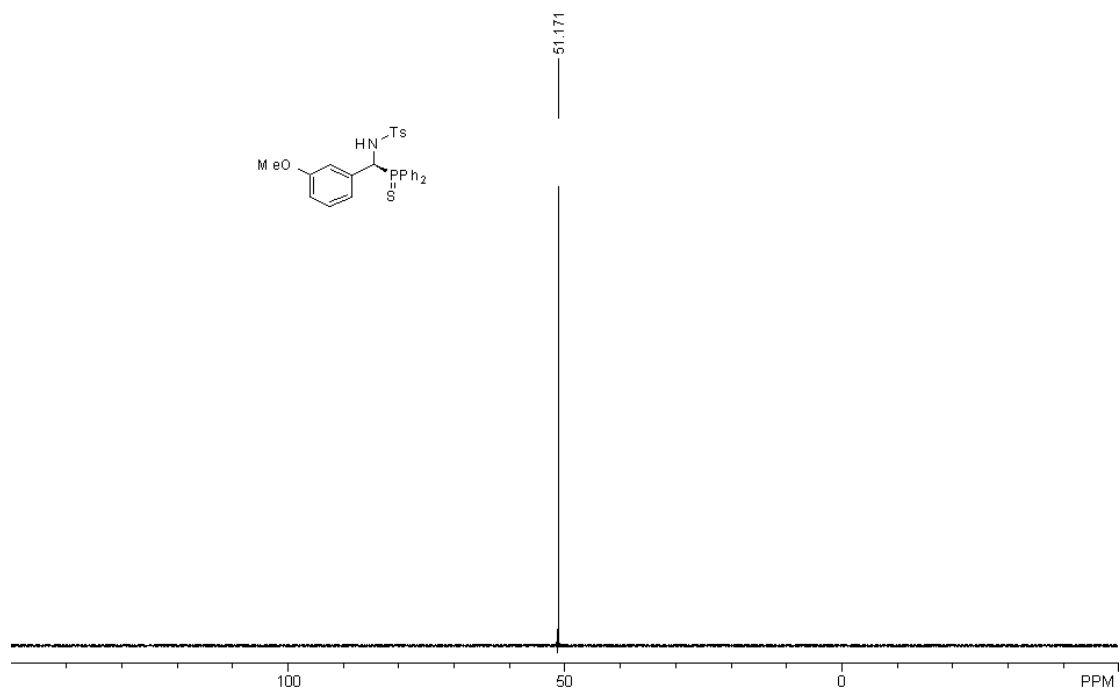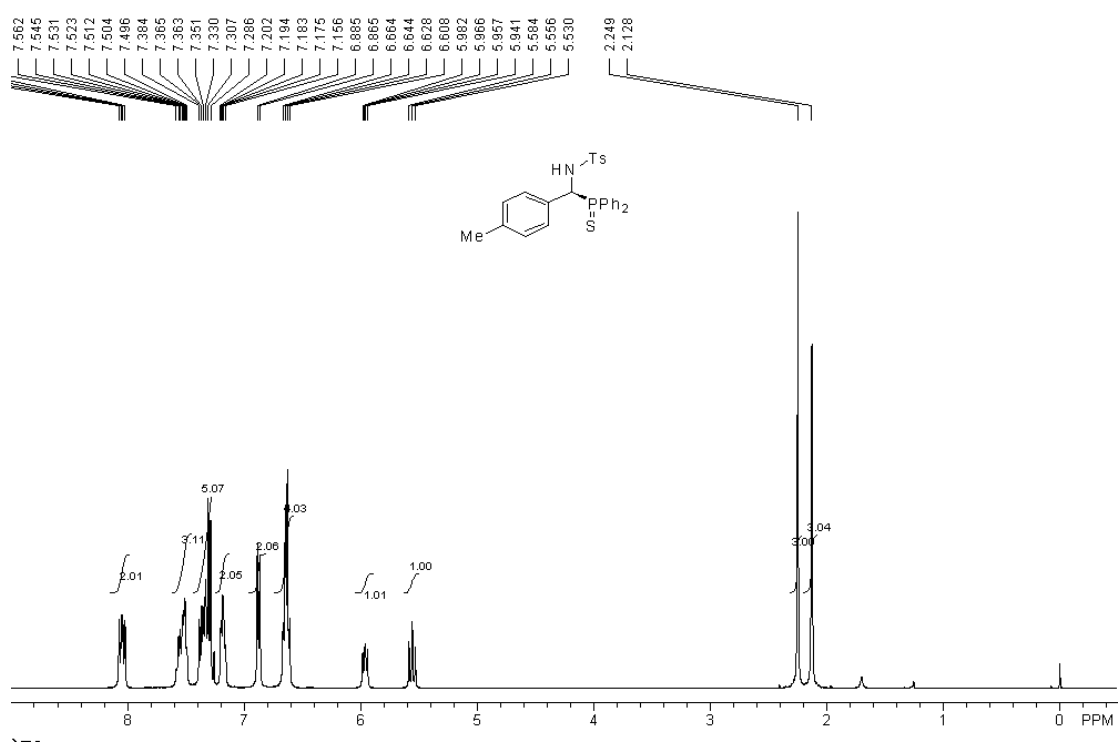

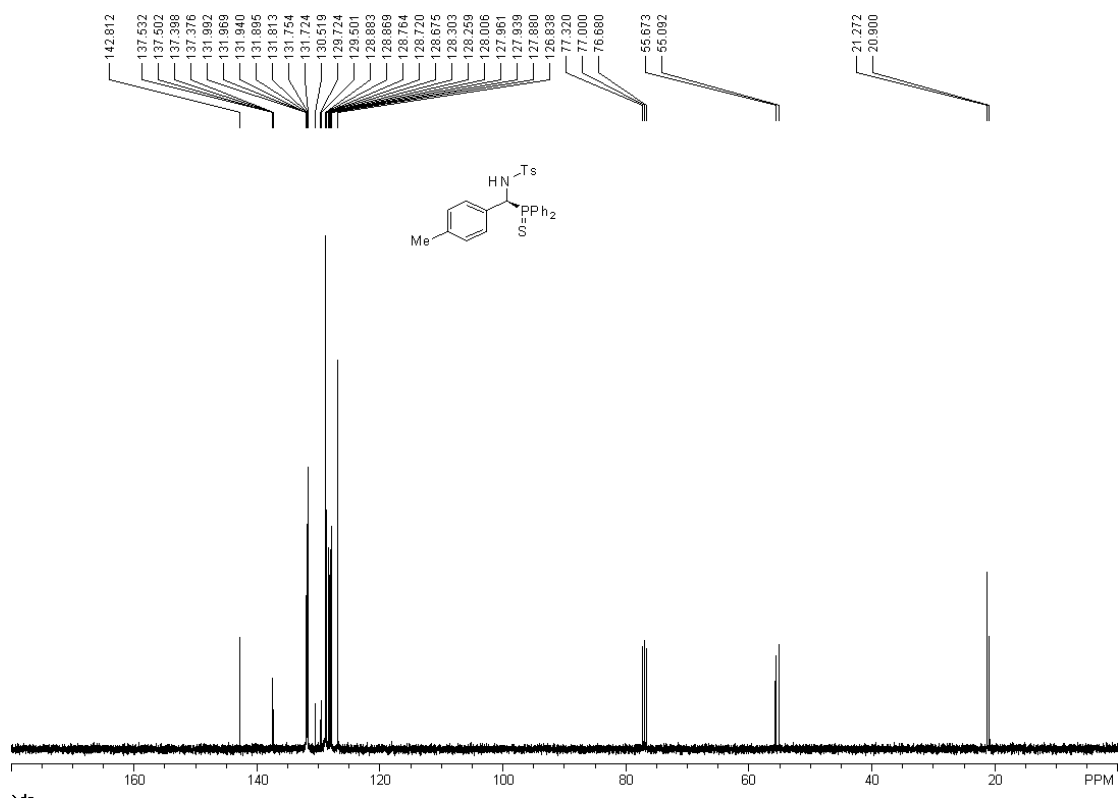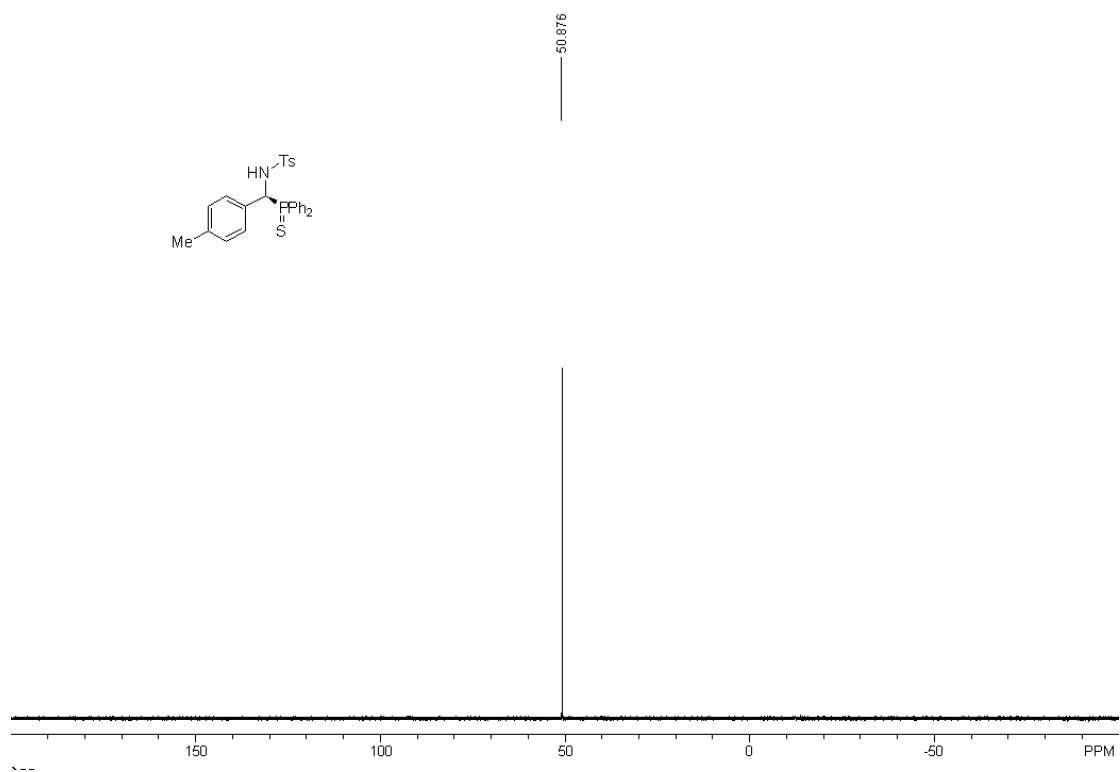



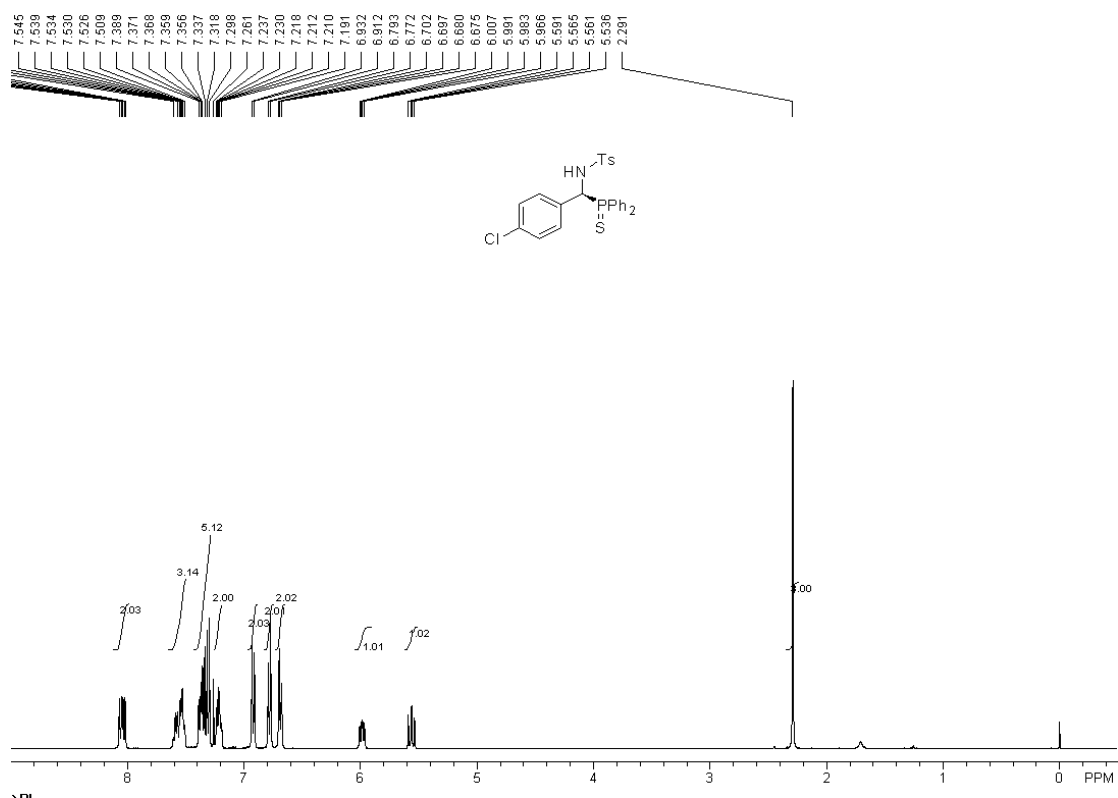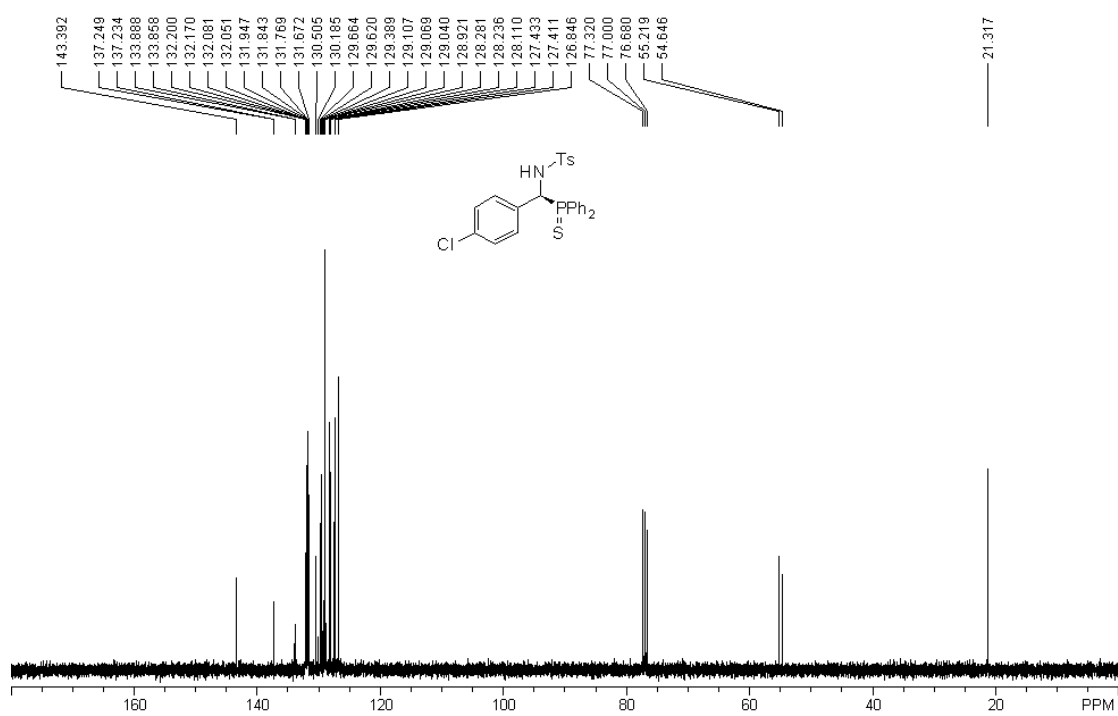

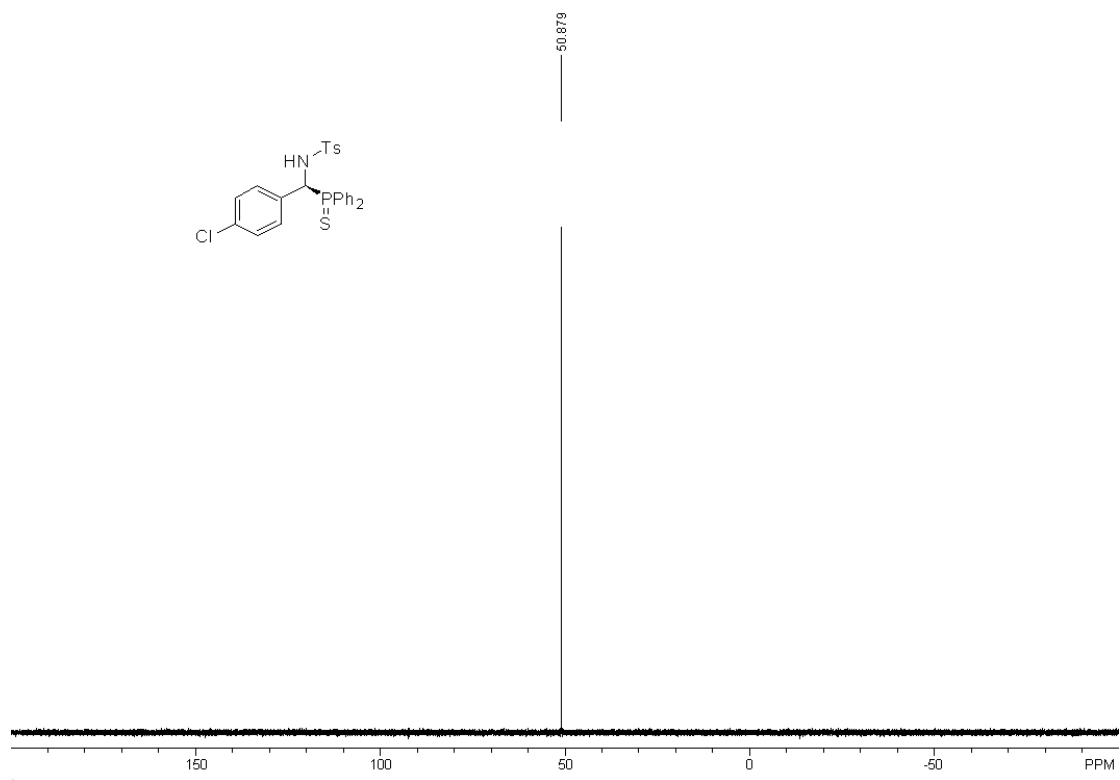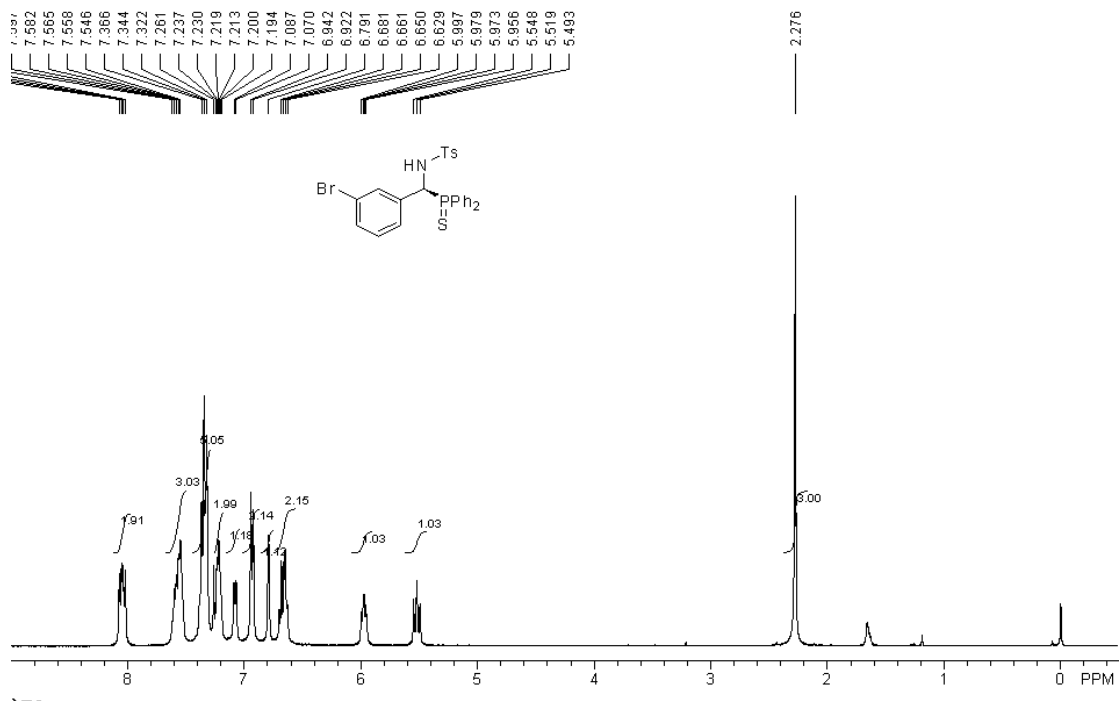

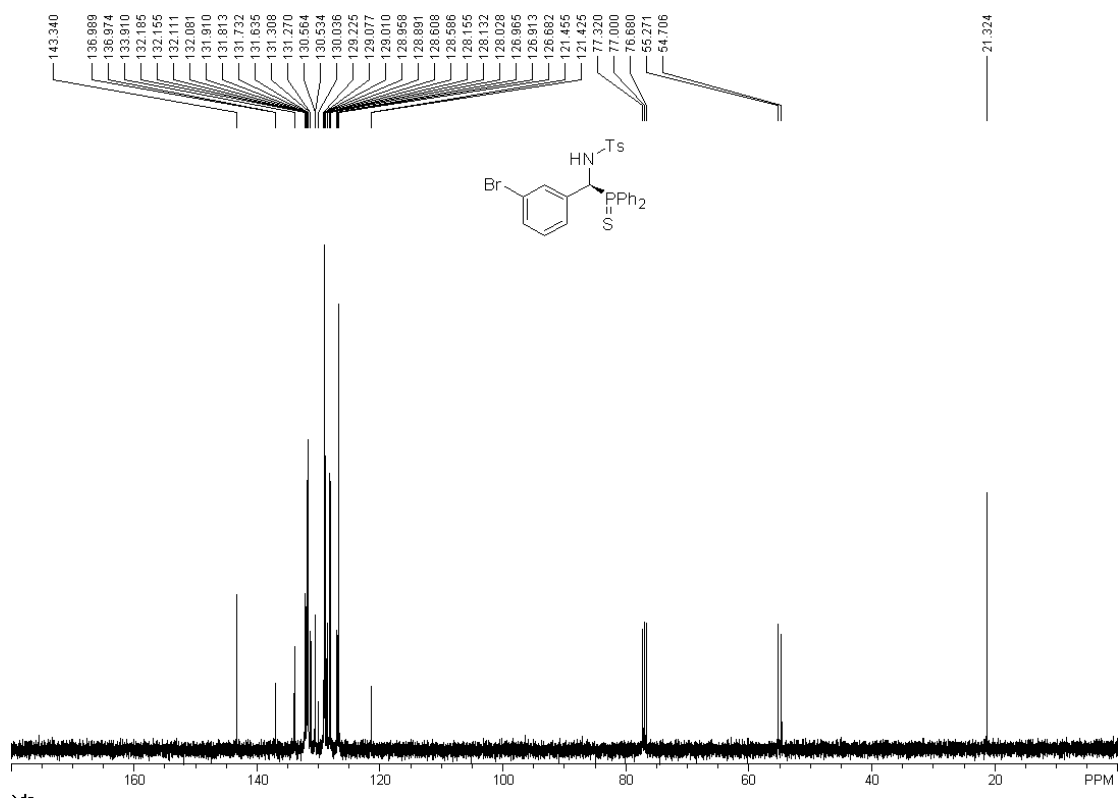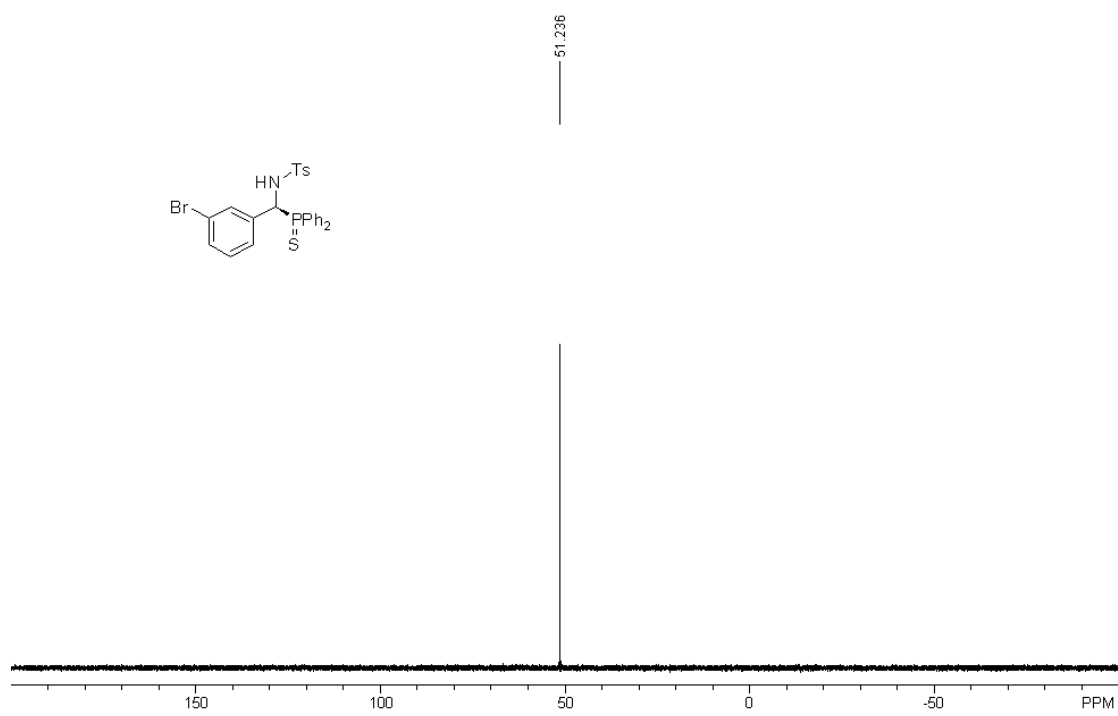

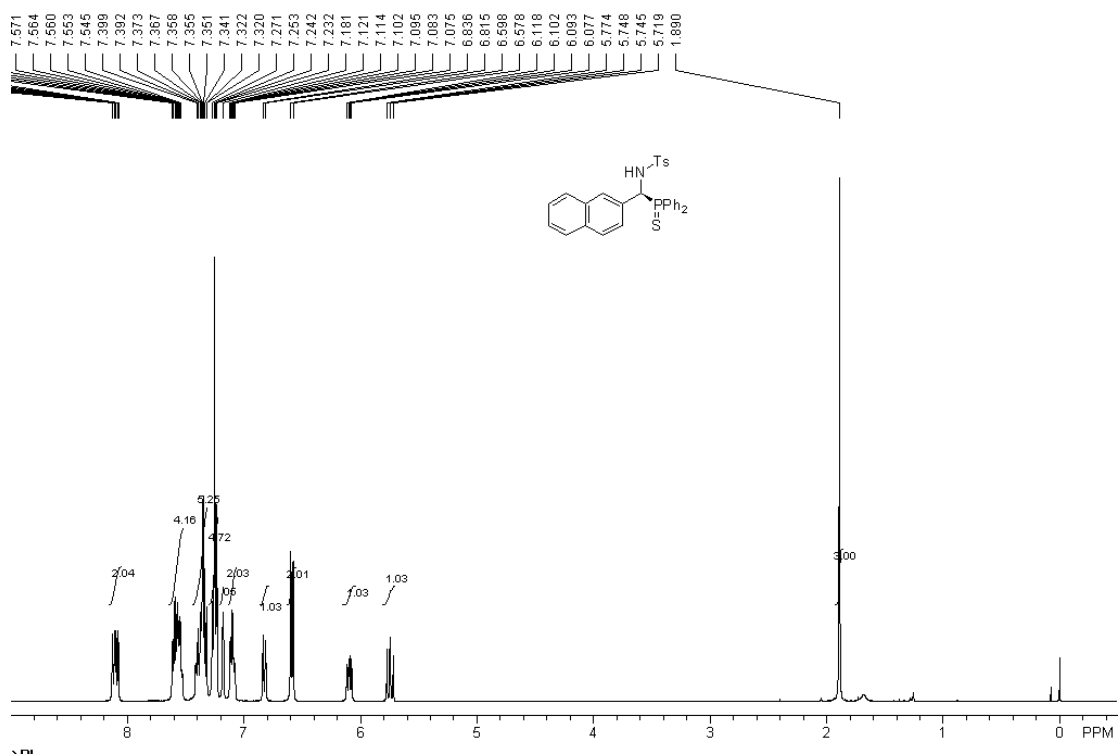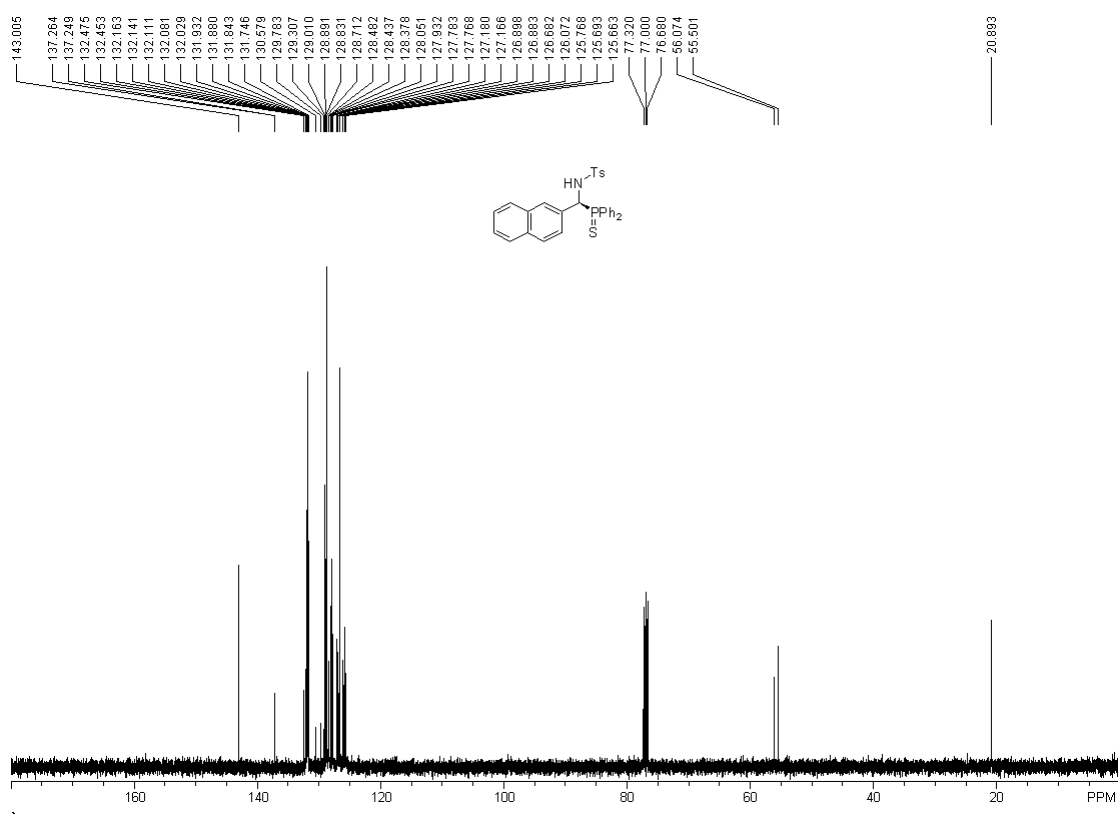

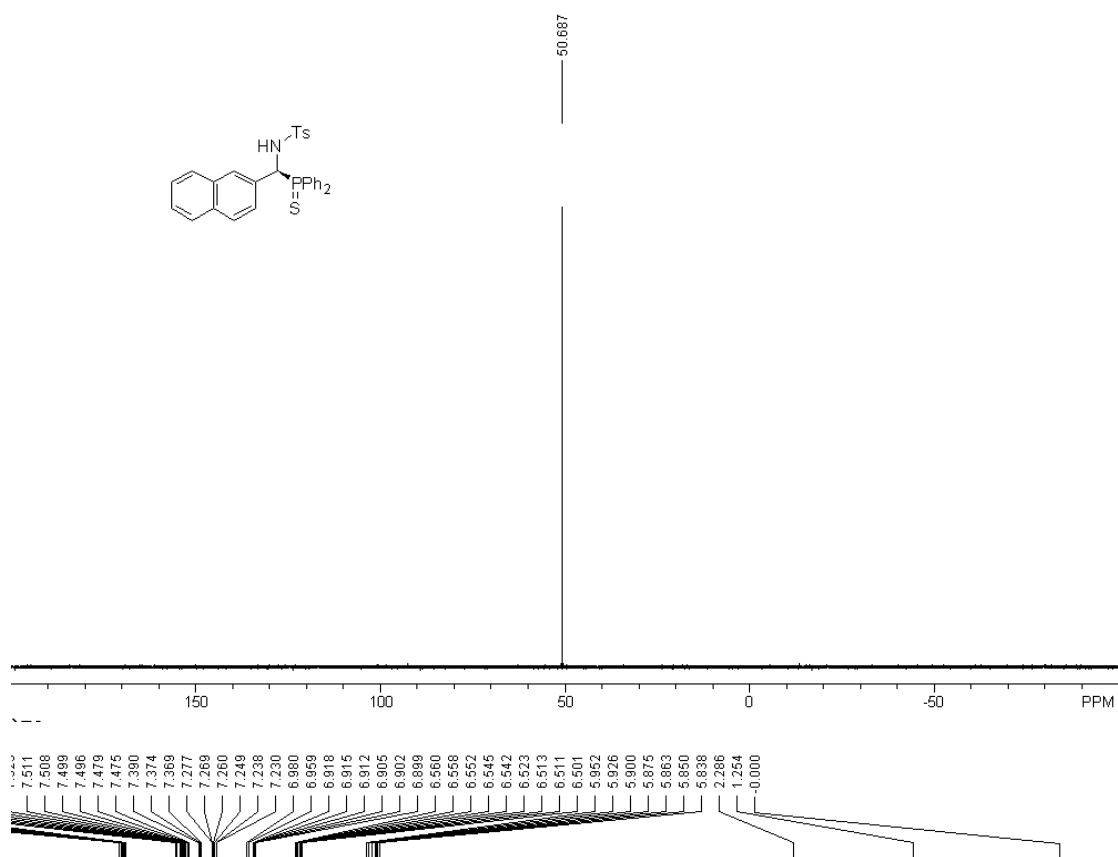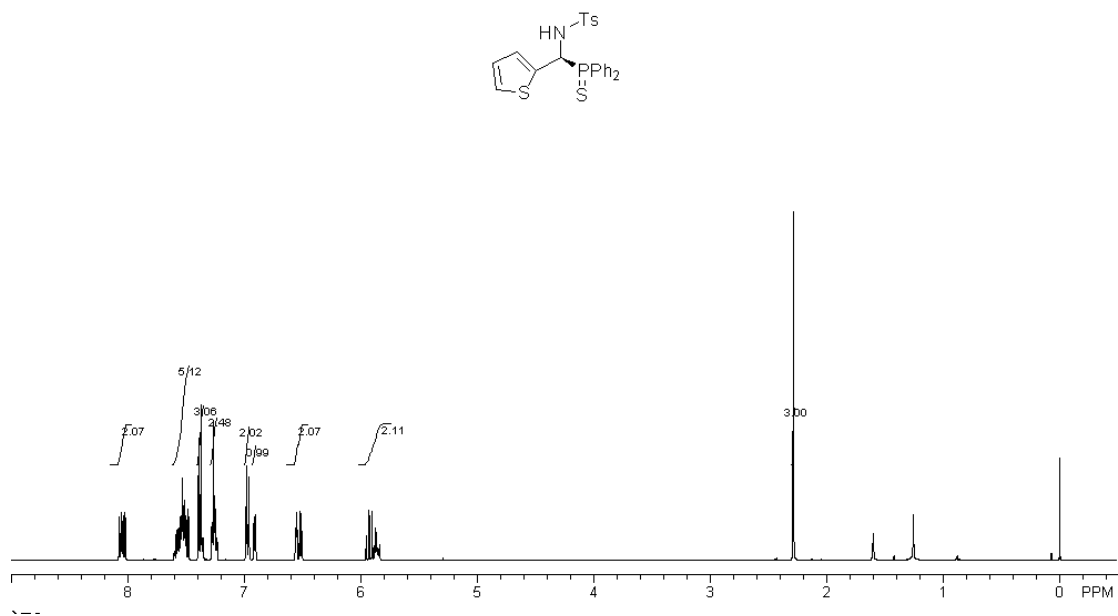

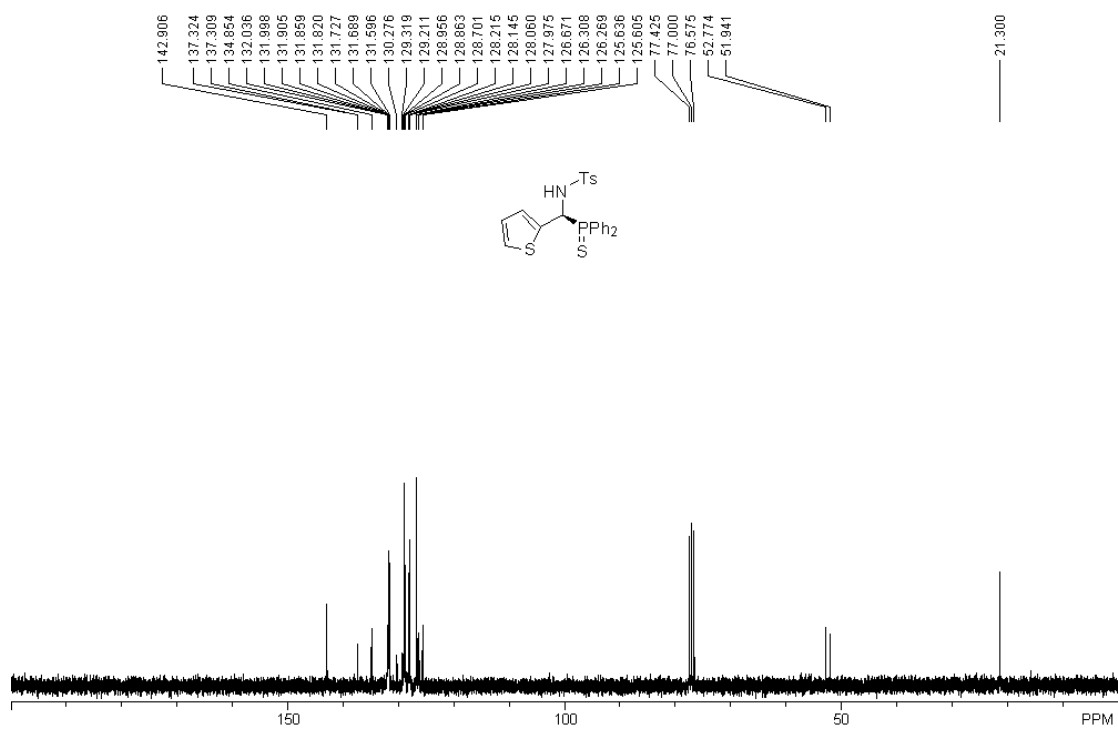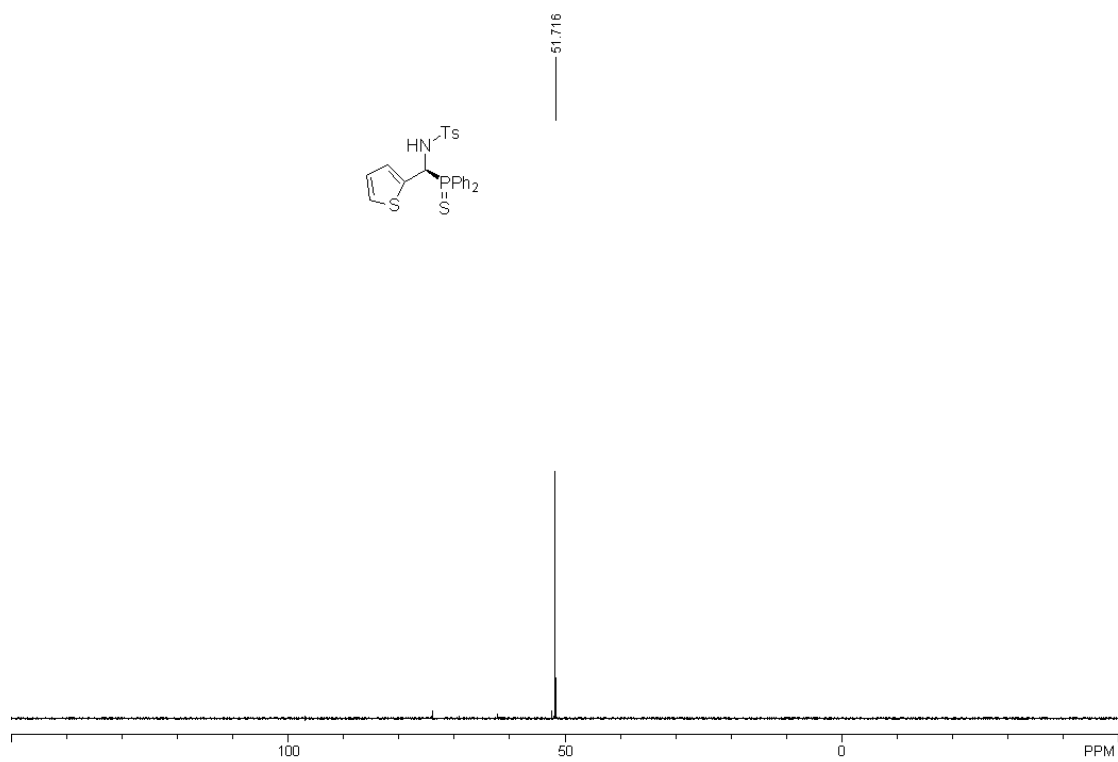

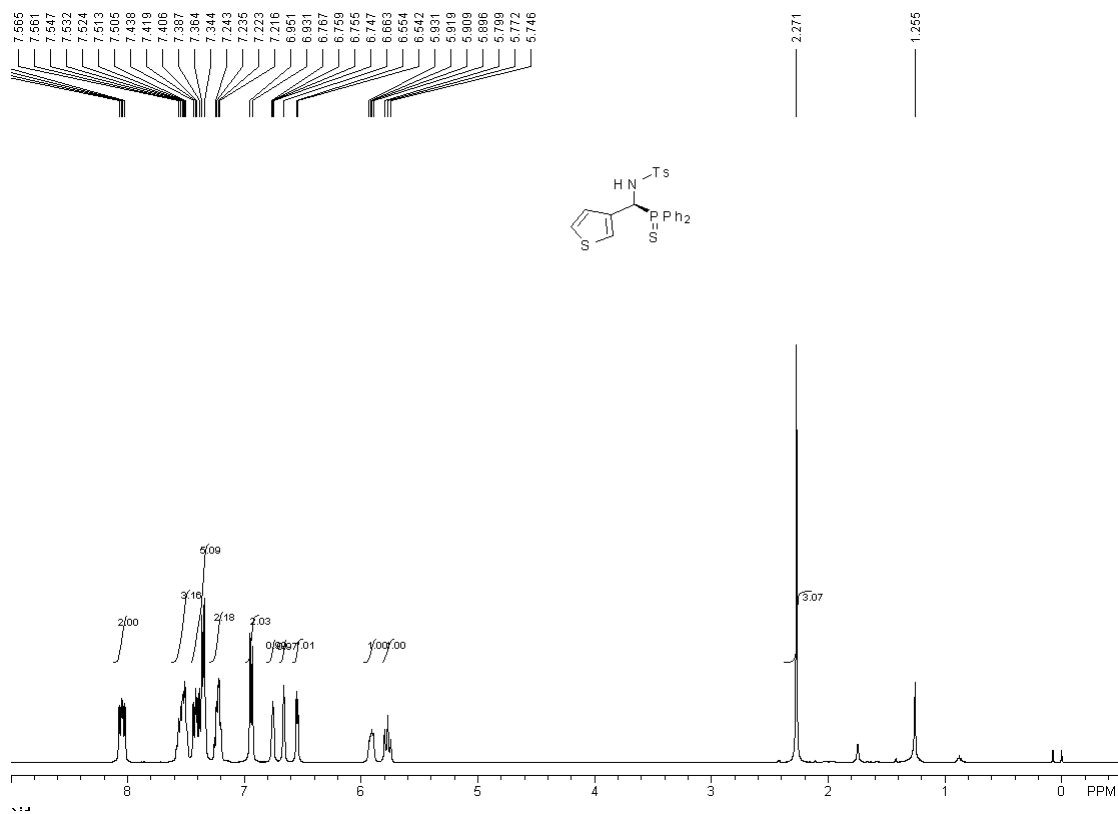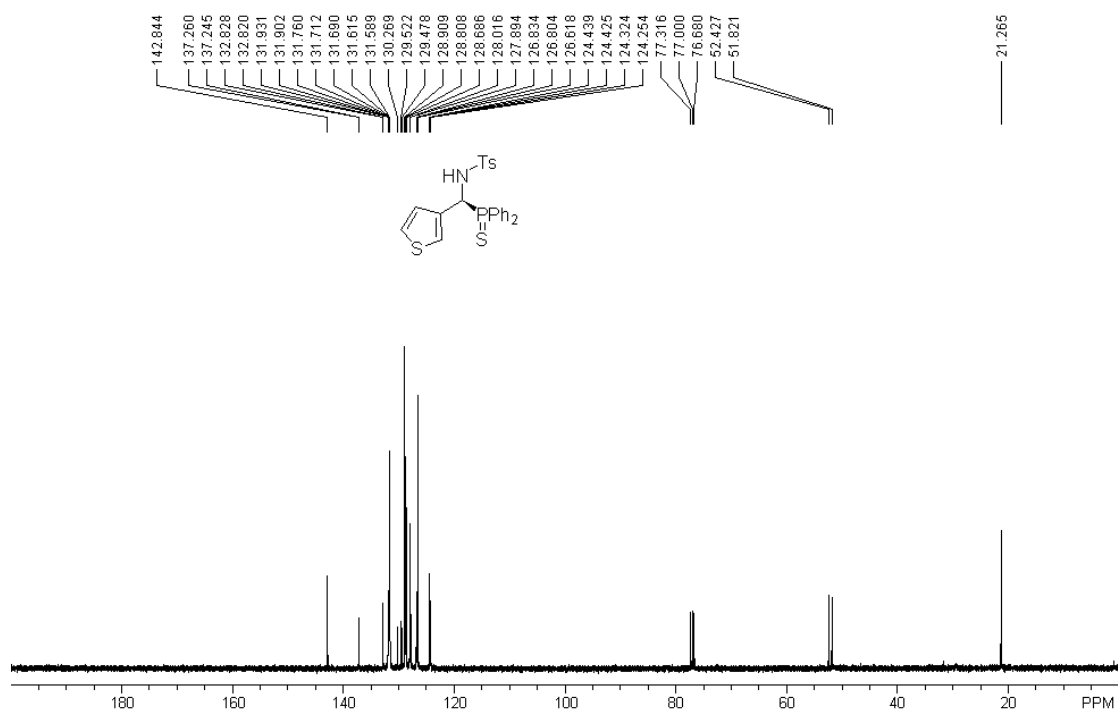

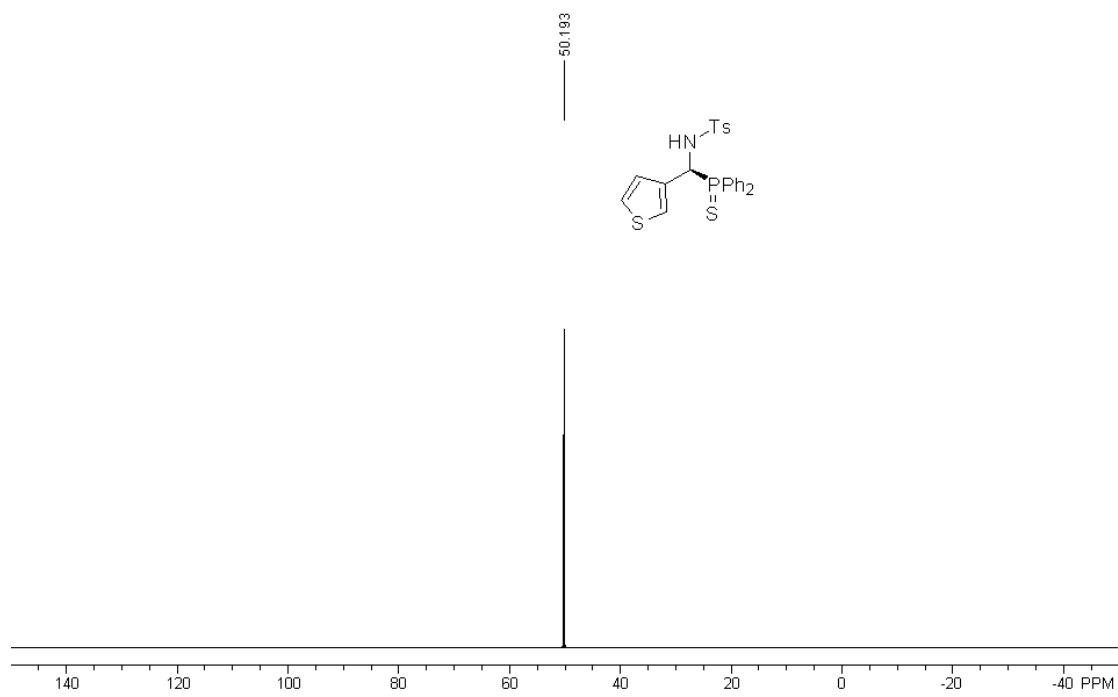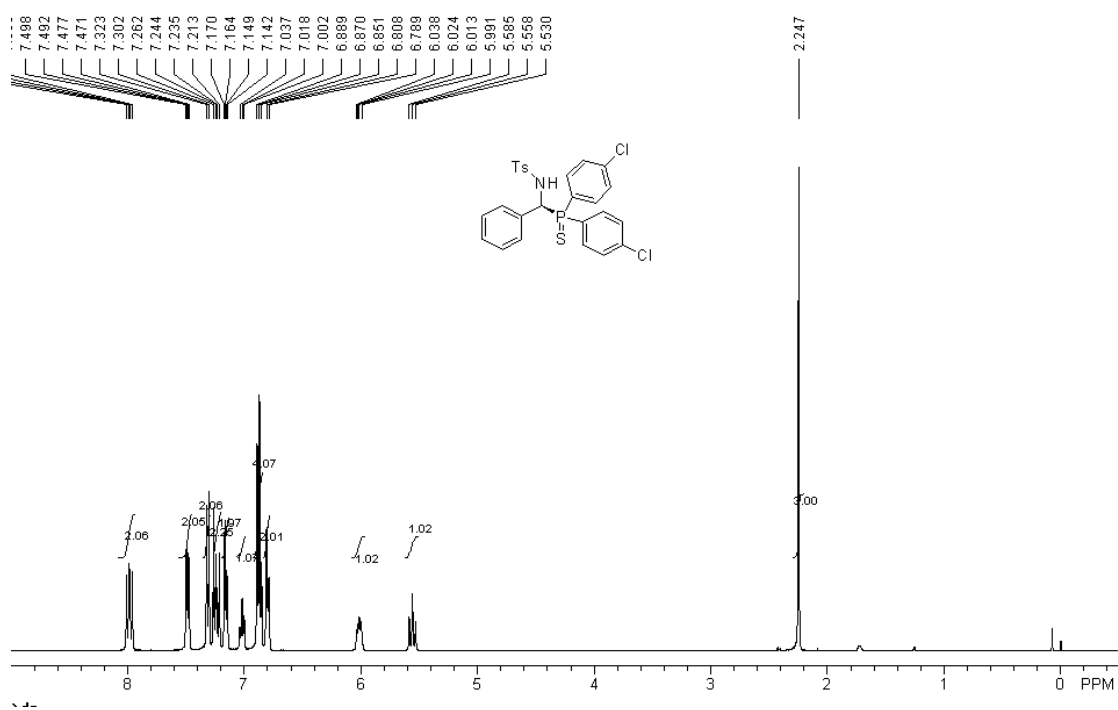



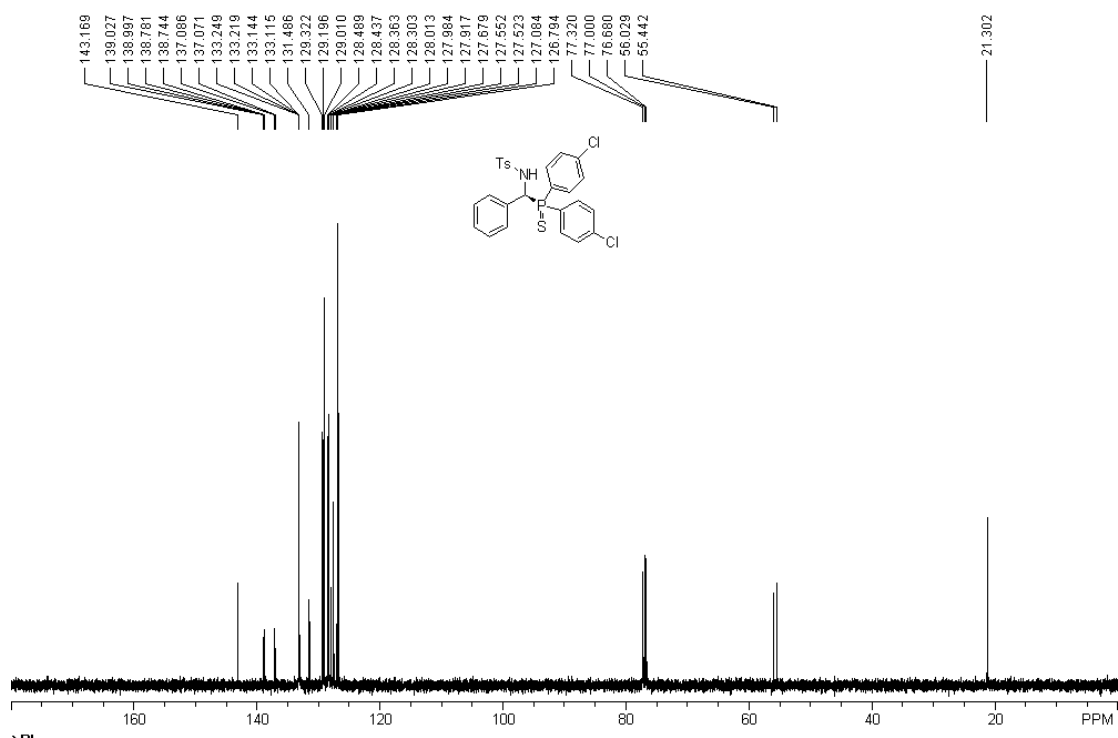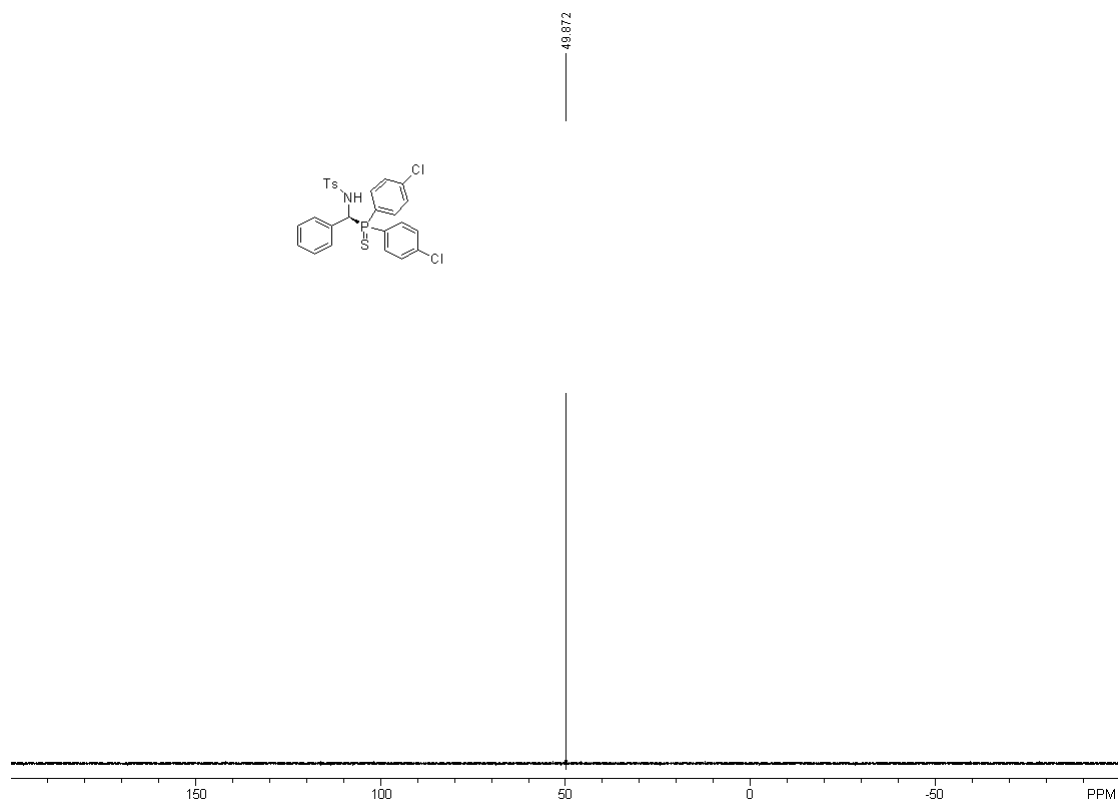

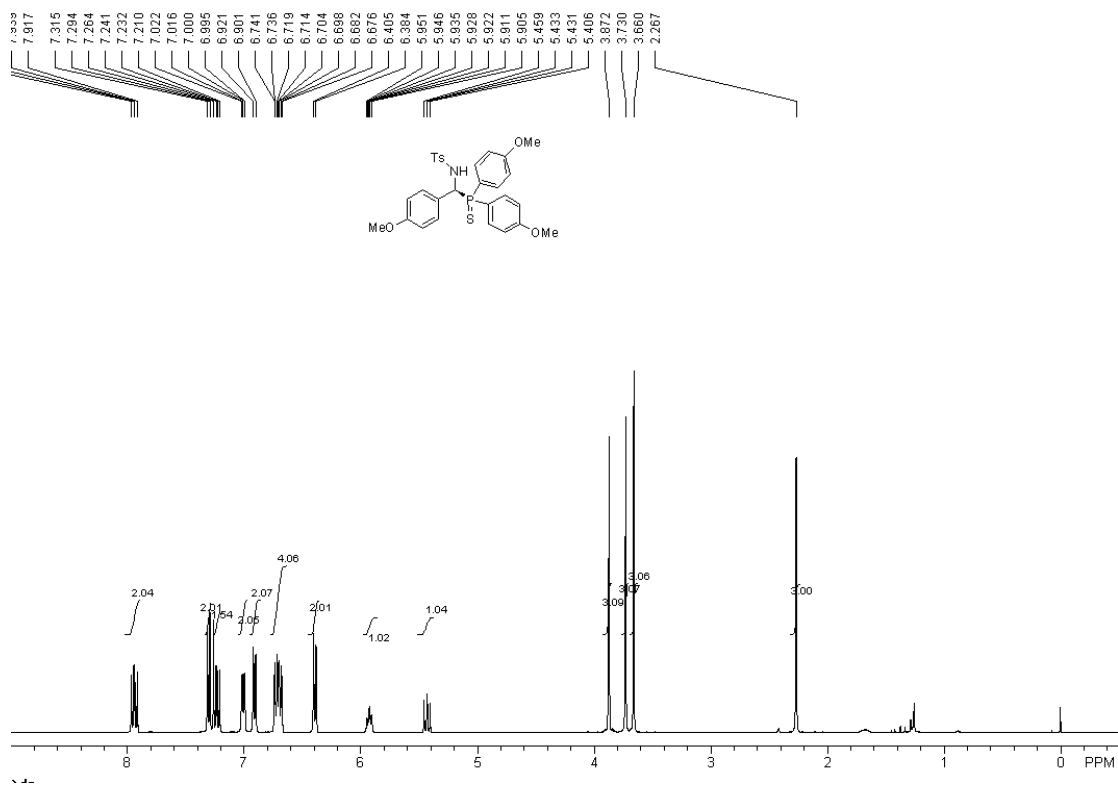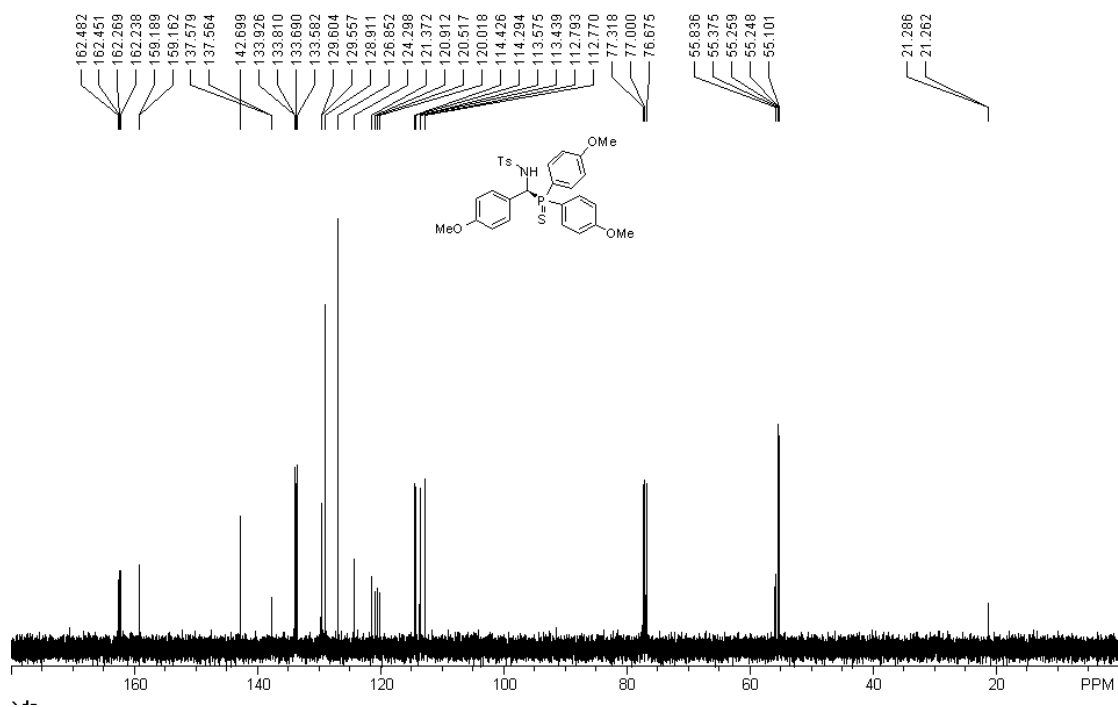

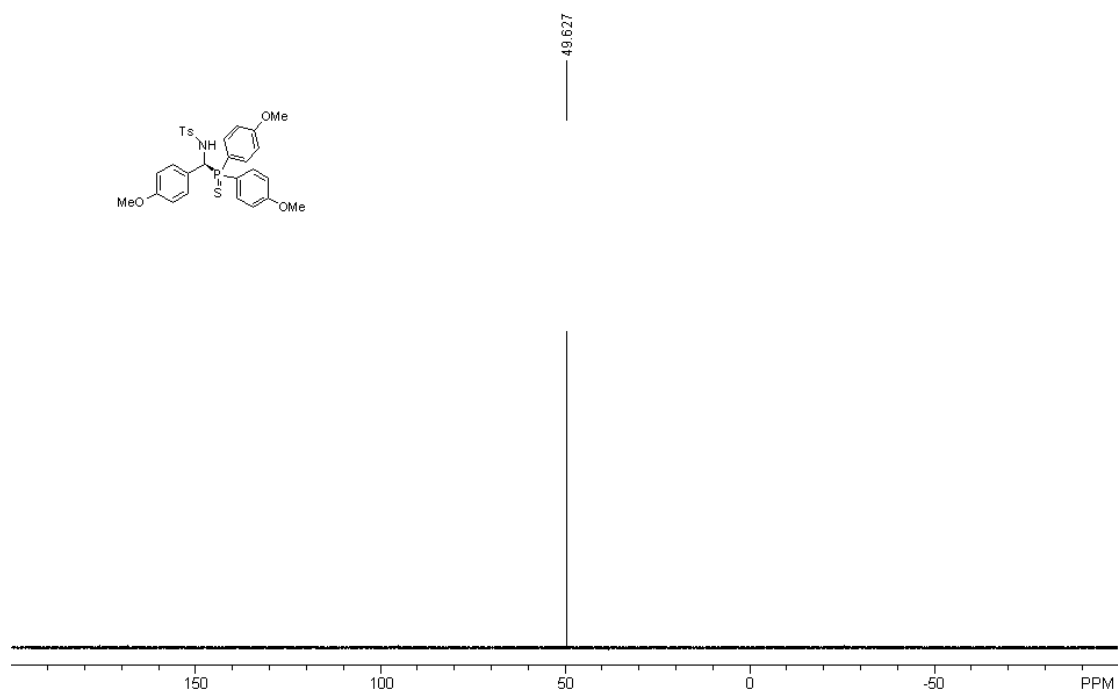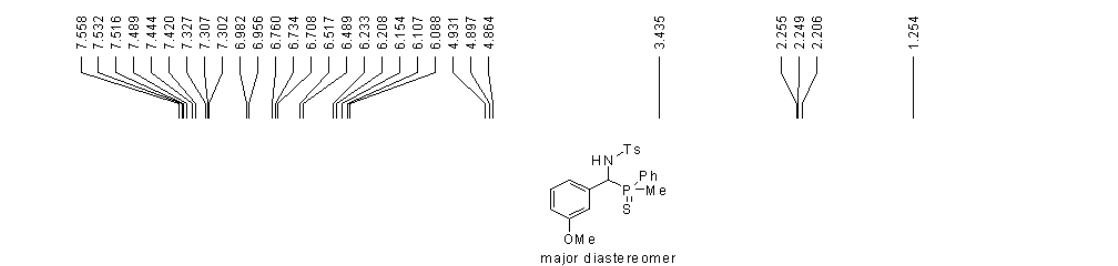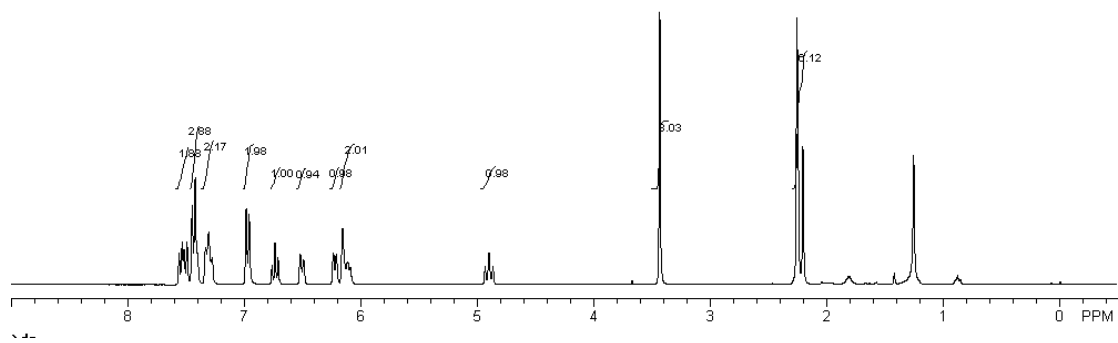

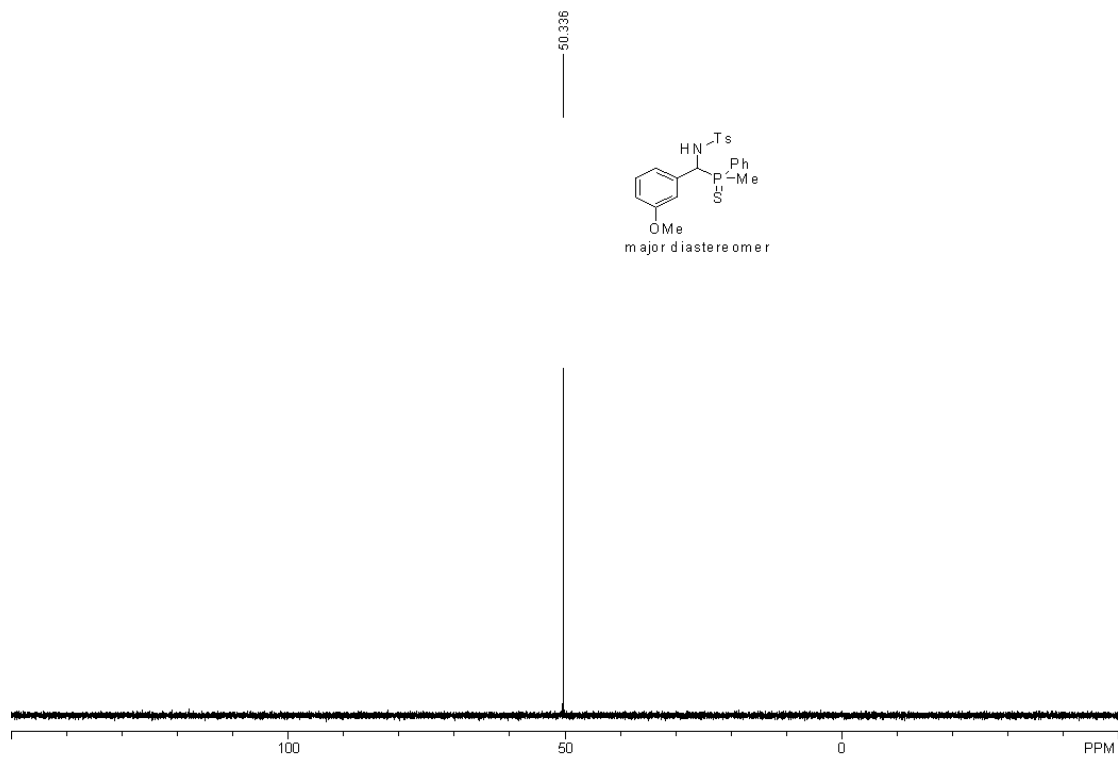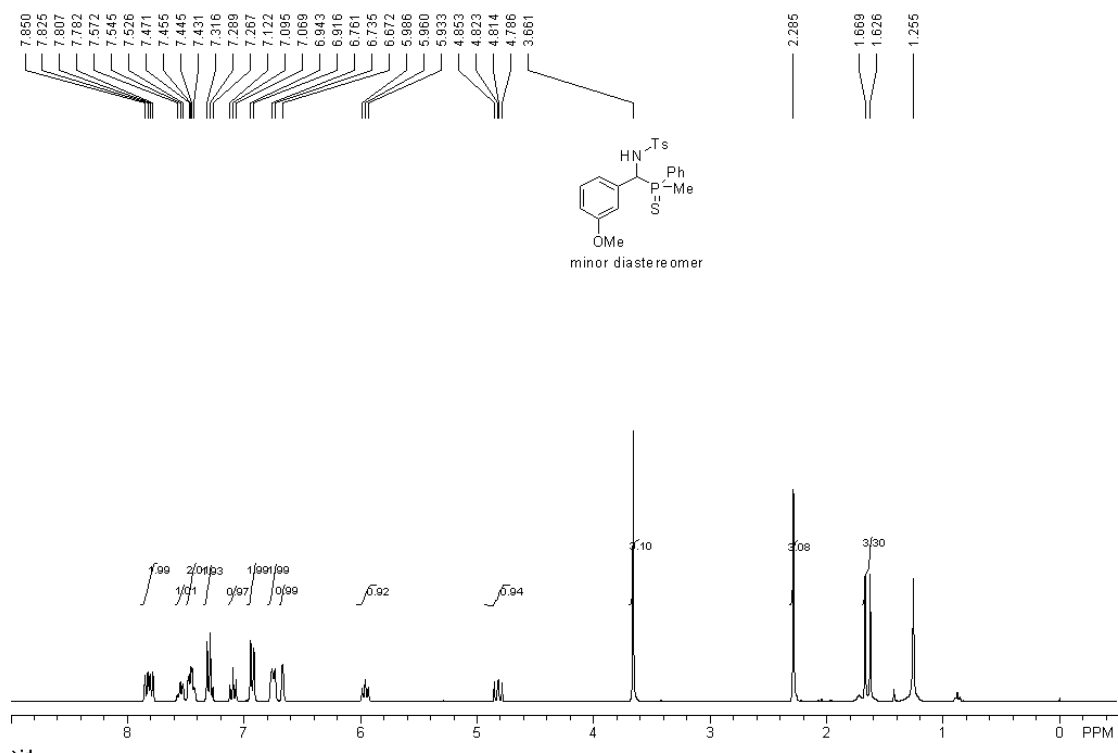

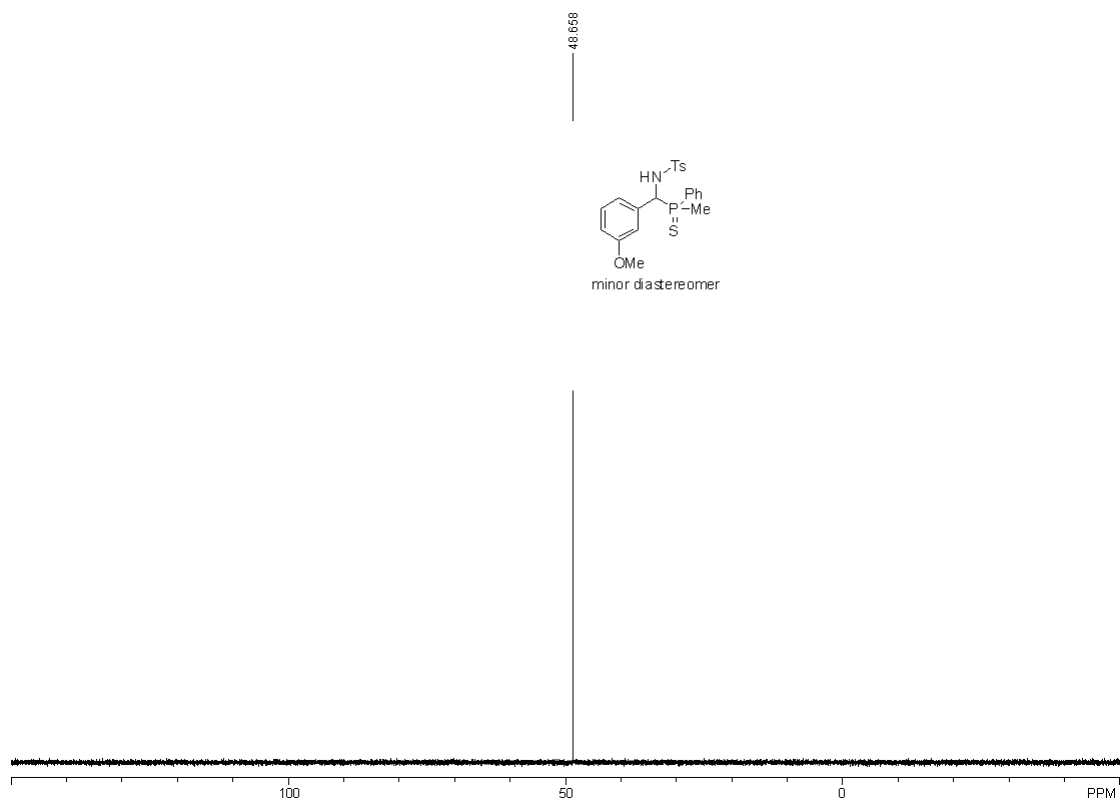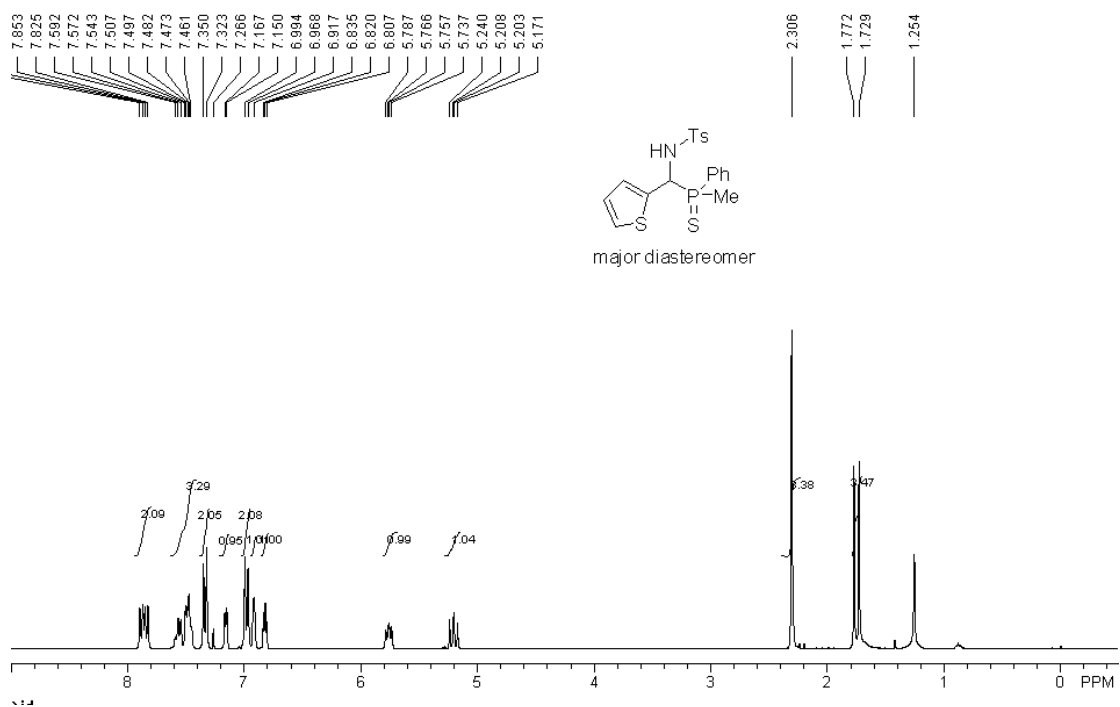

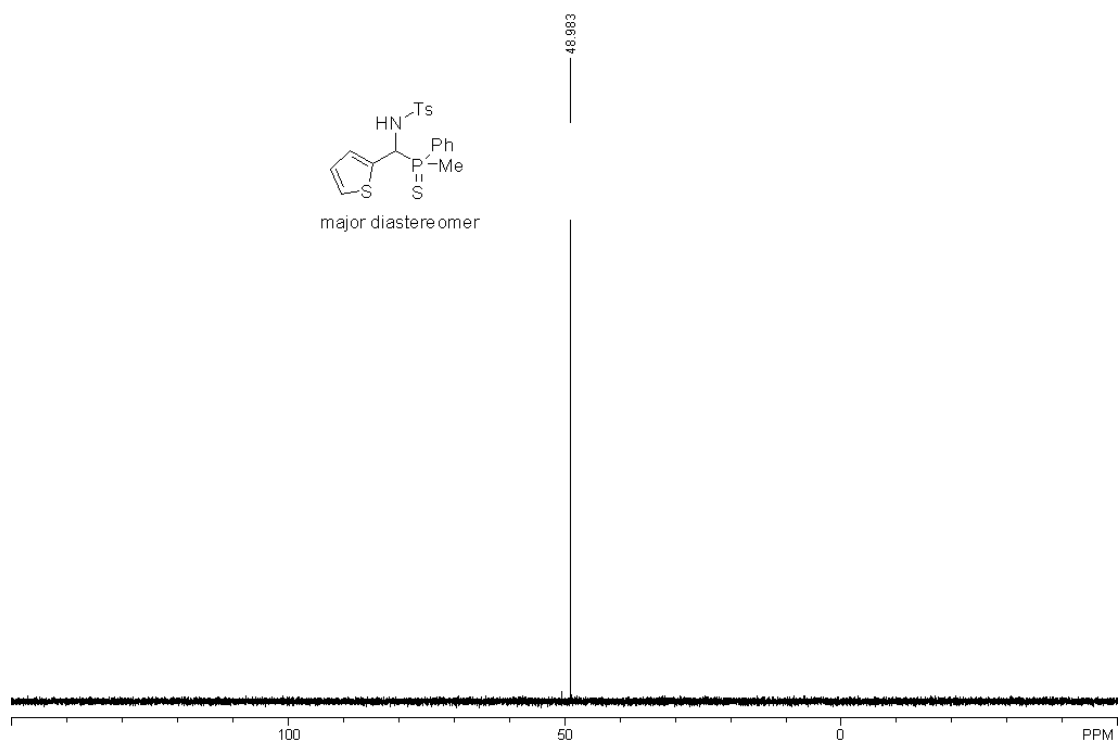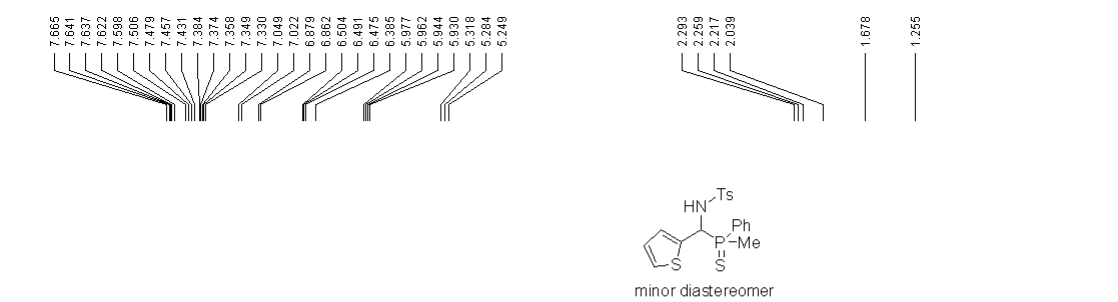

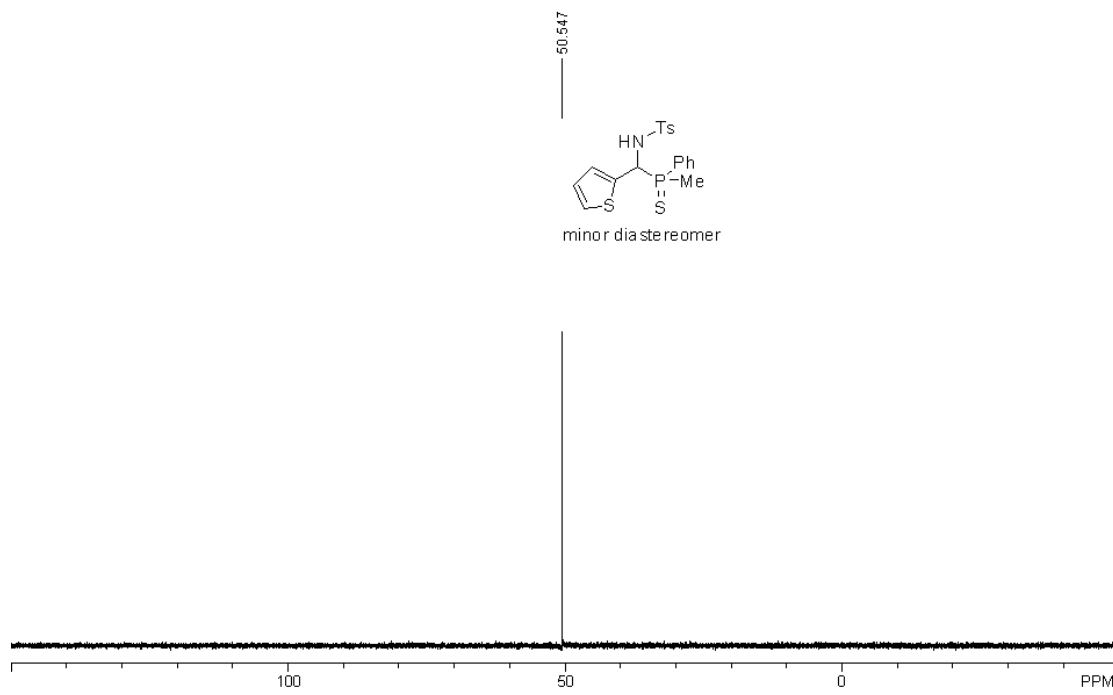

### HLPC Charts

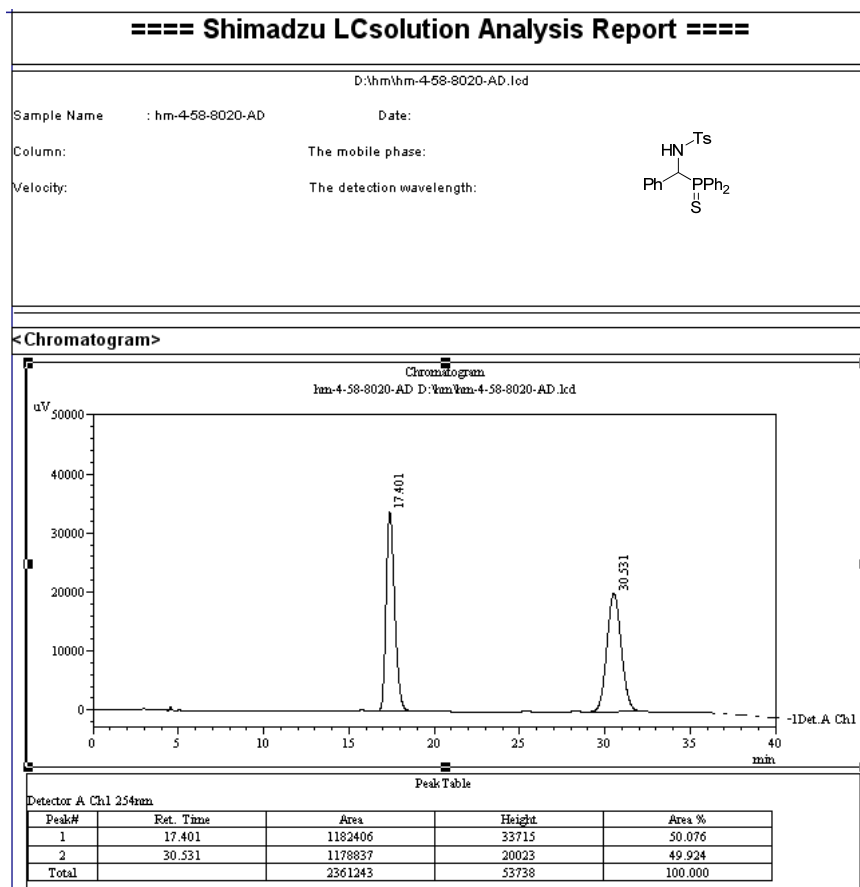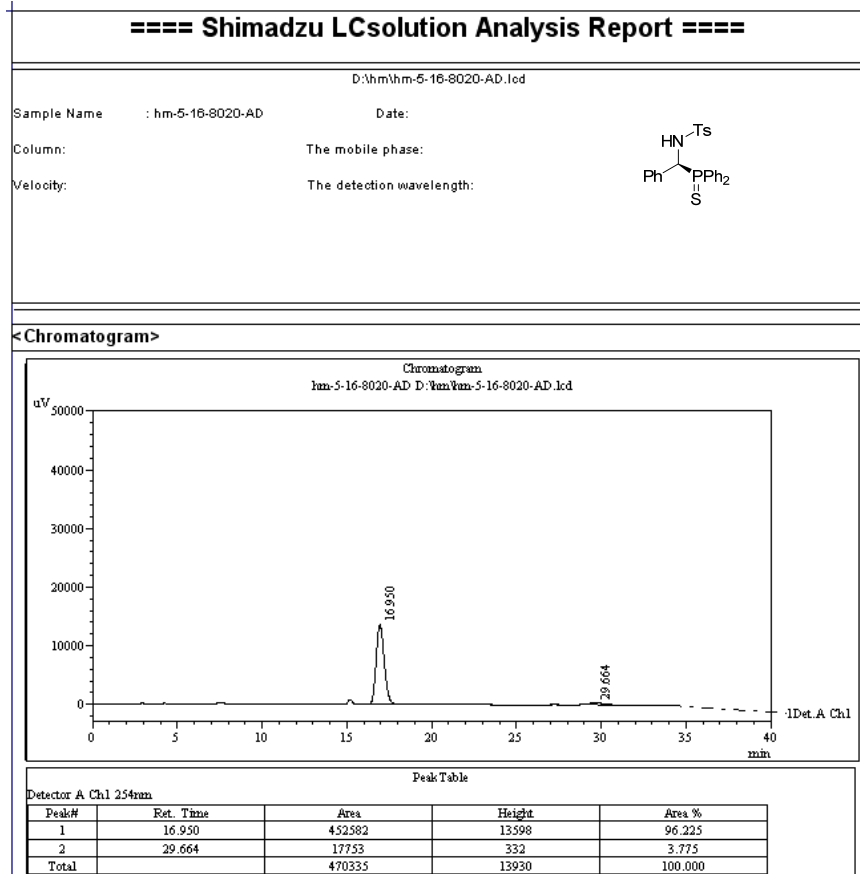



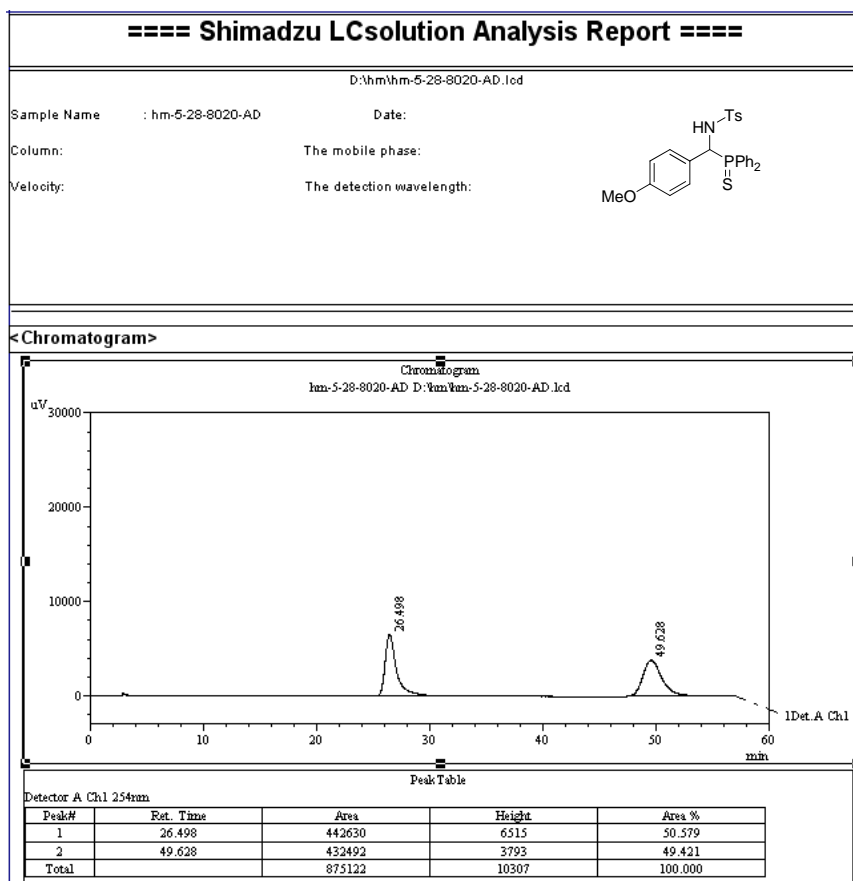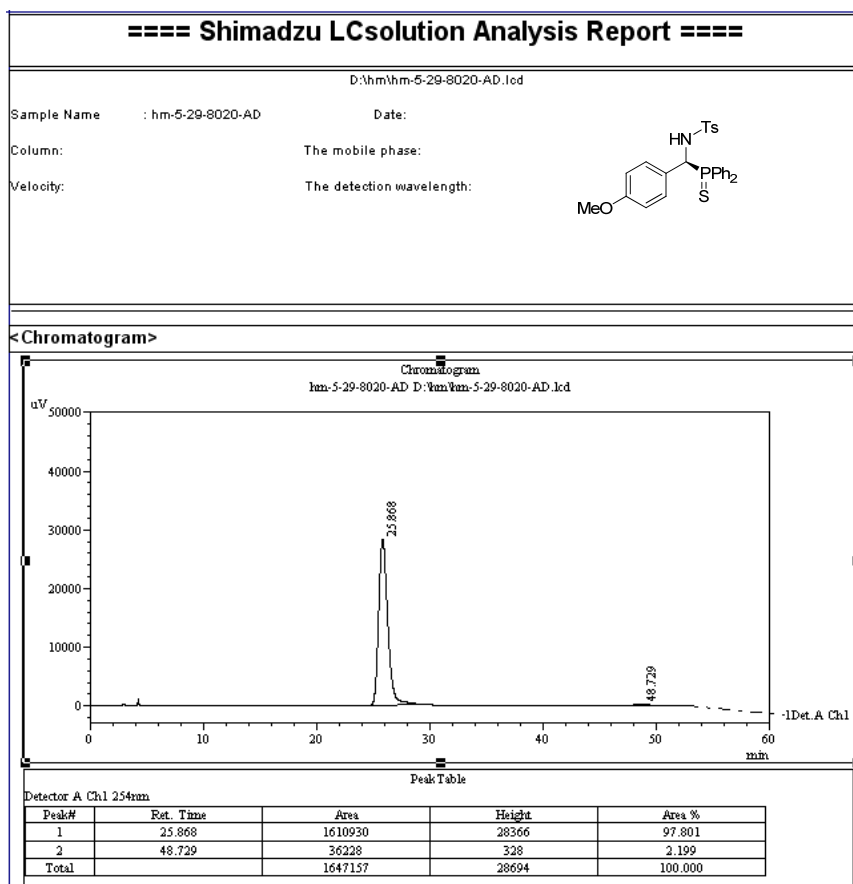

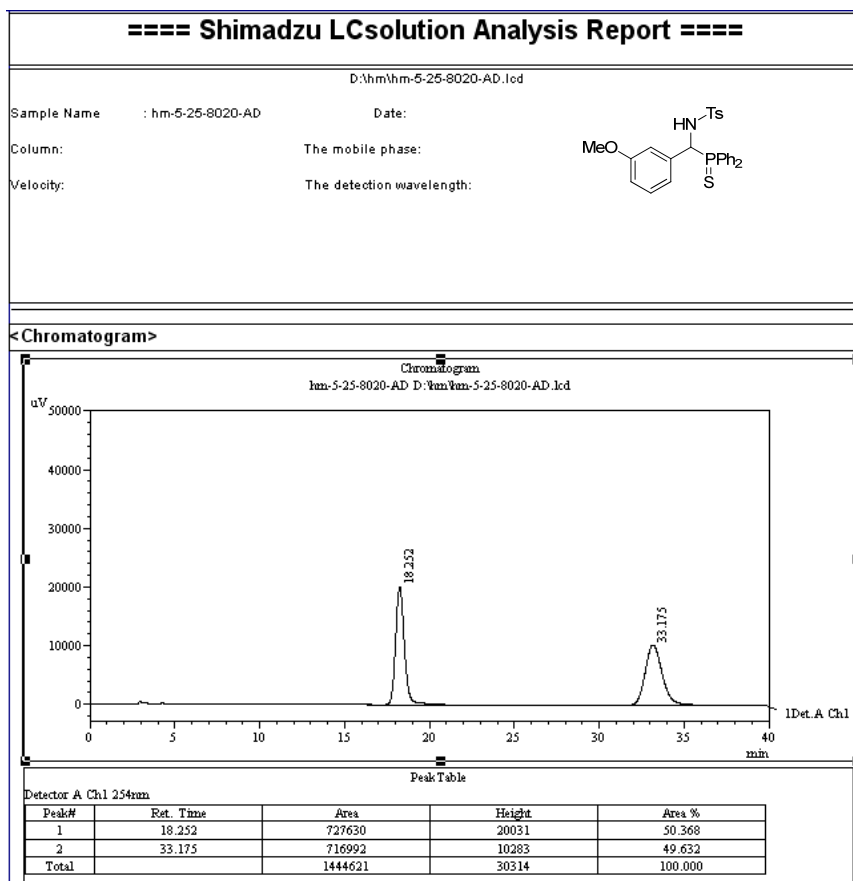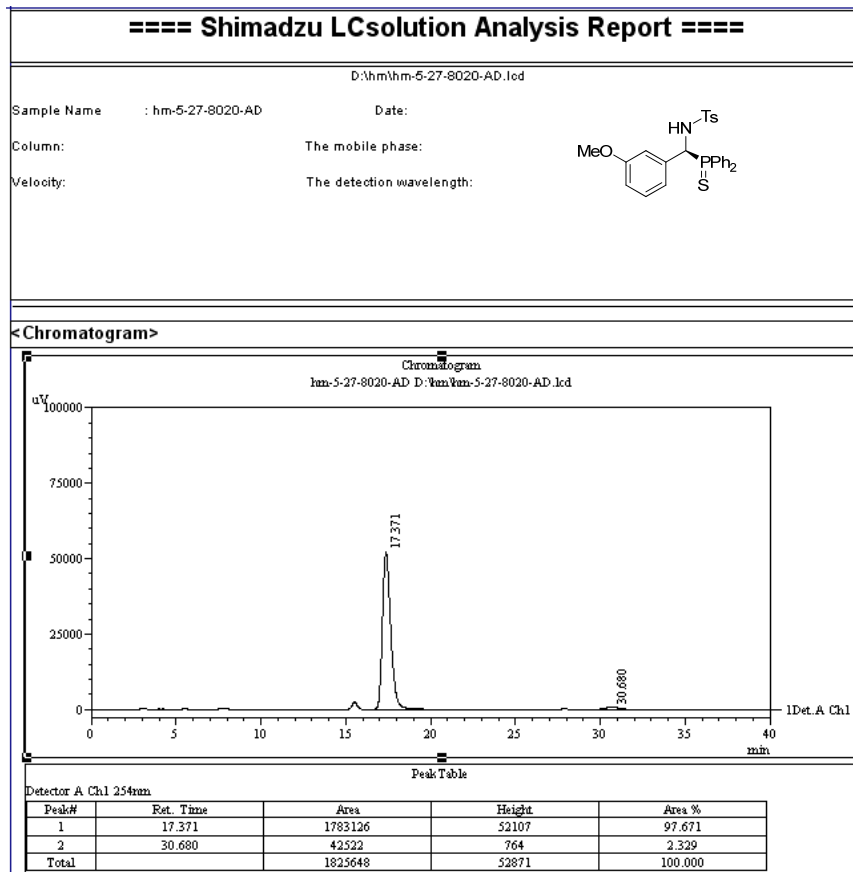

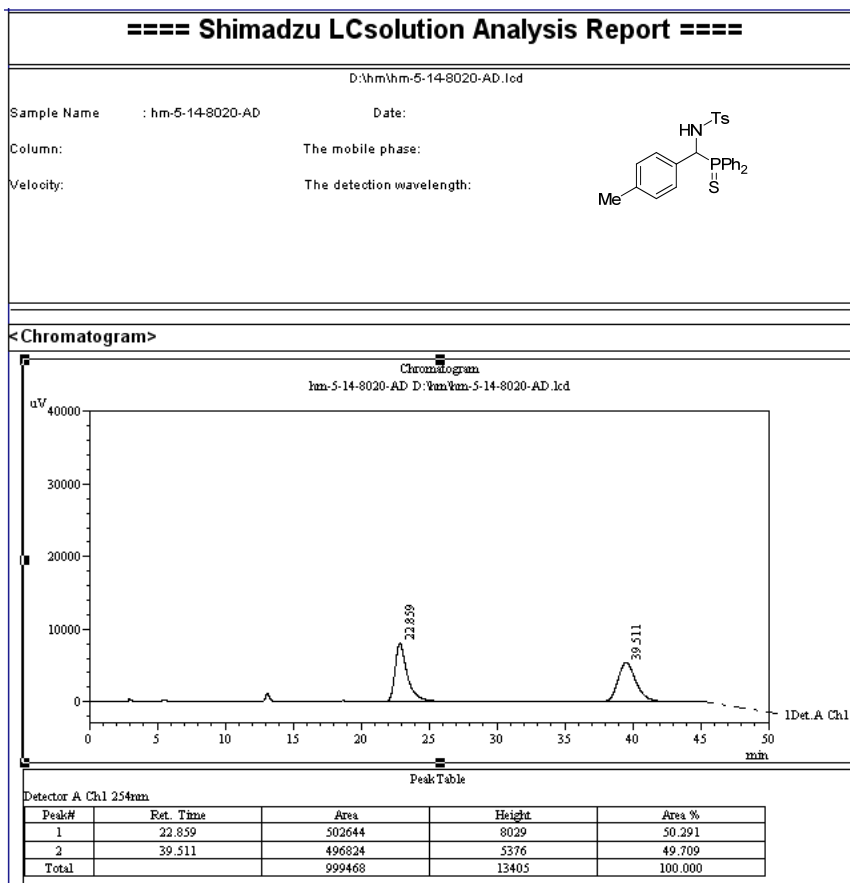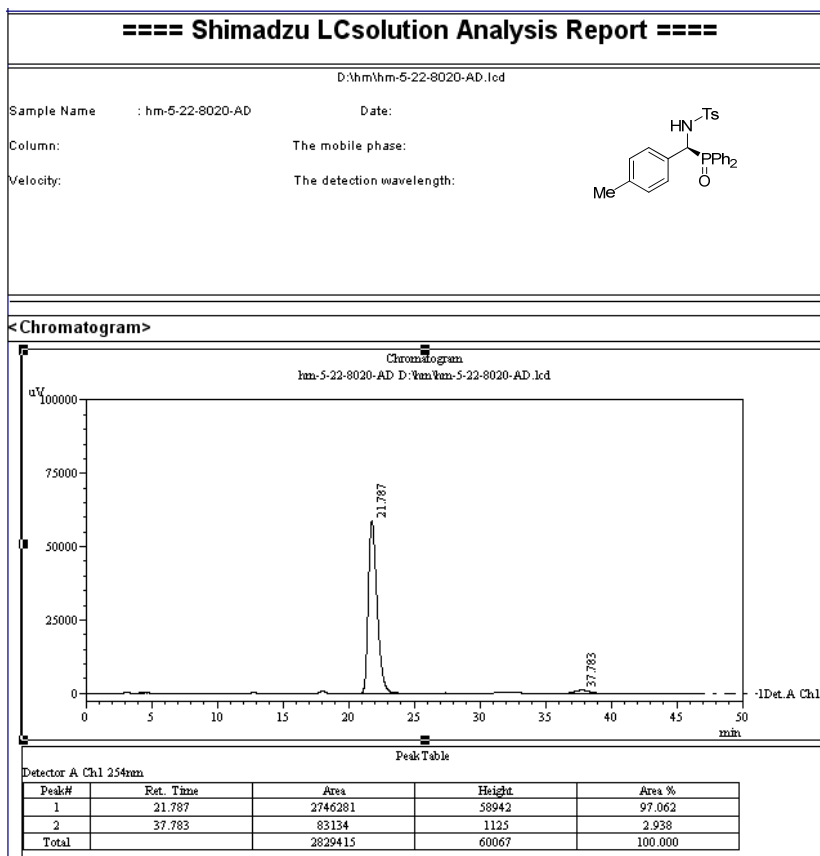

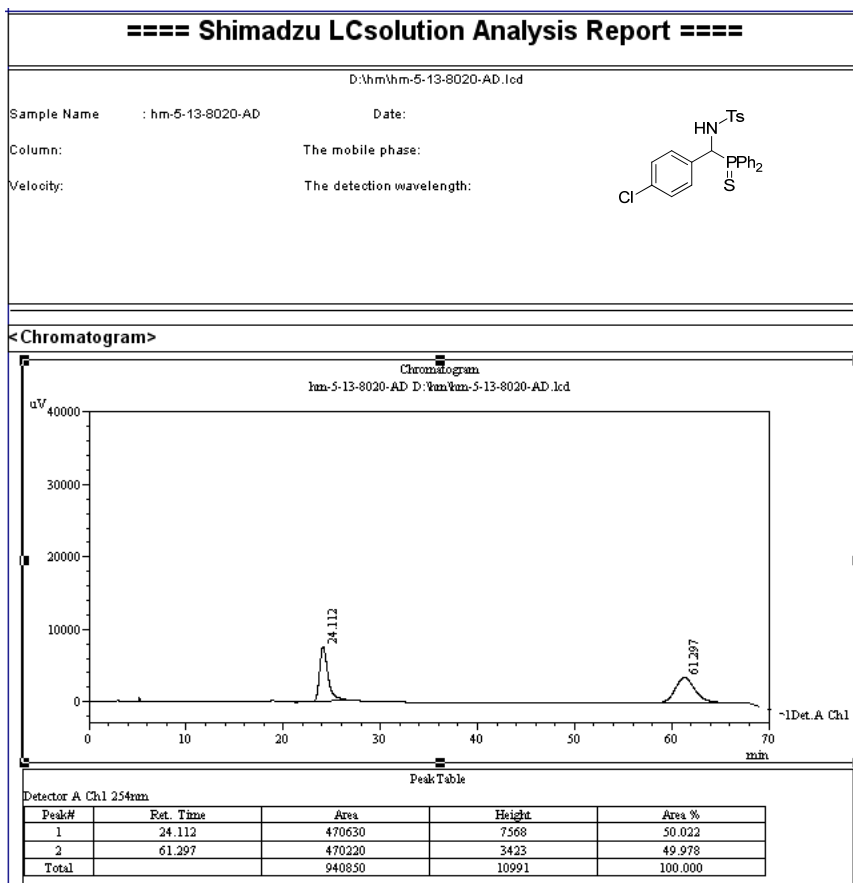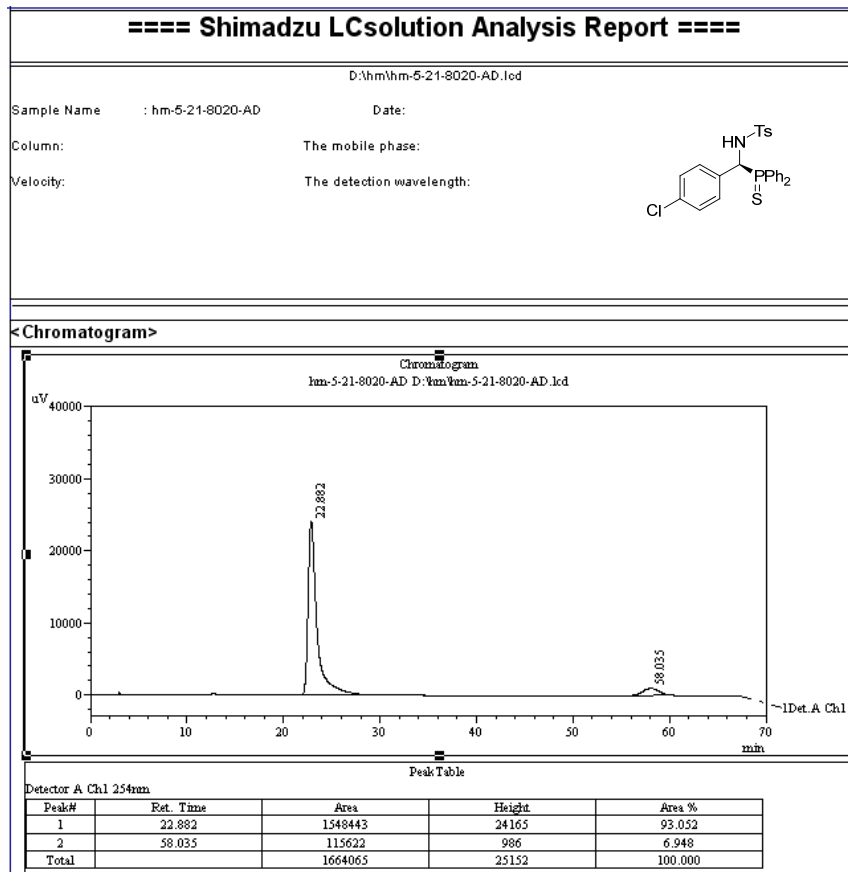

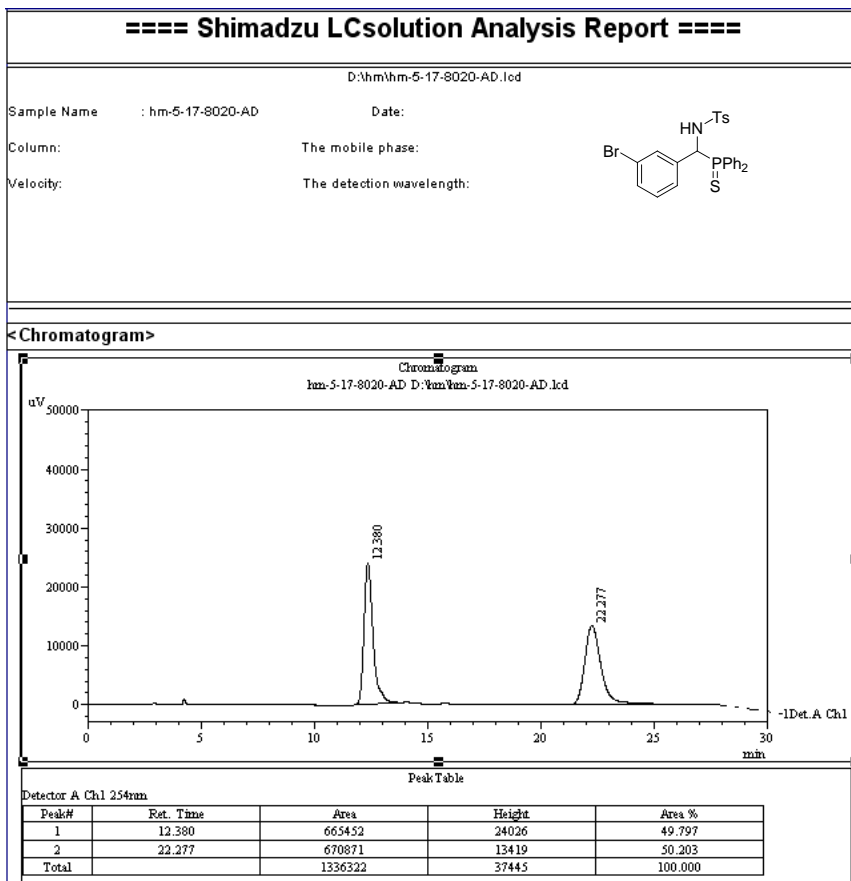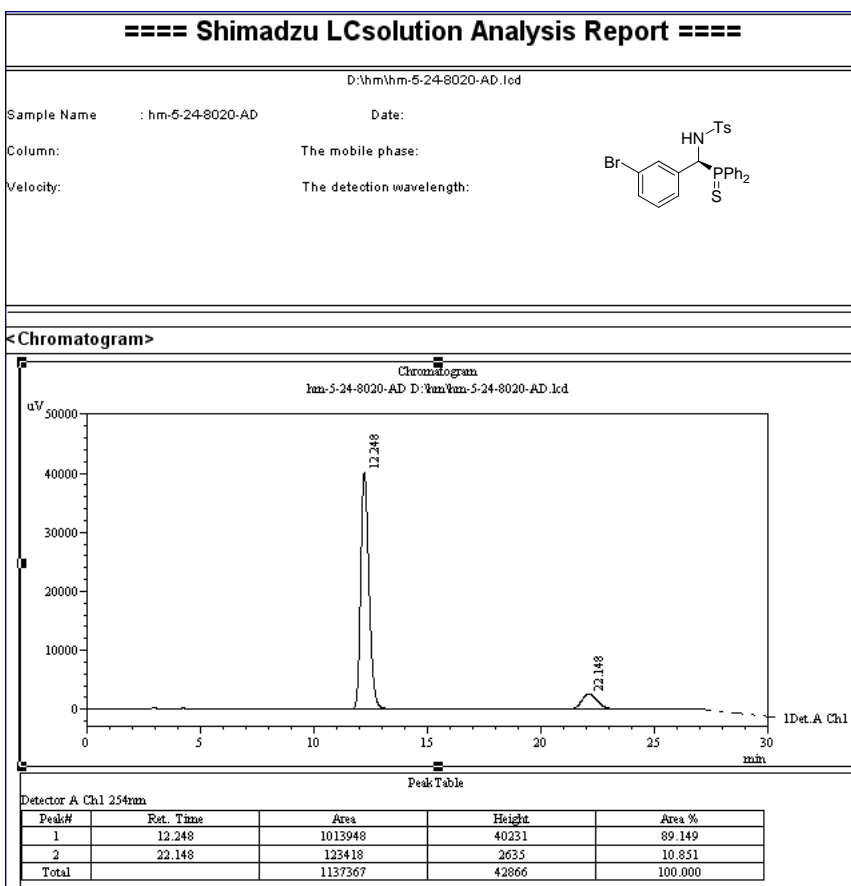

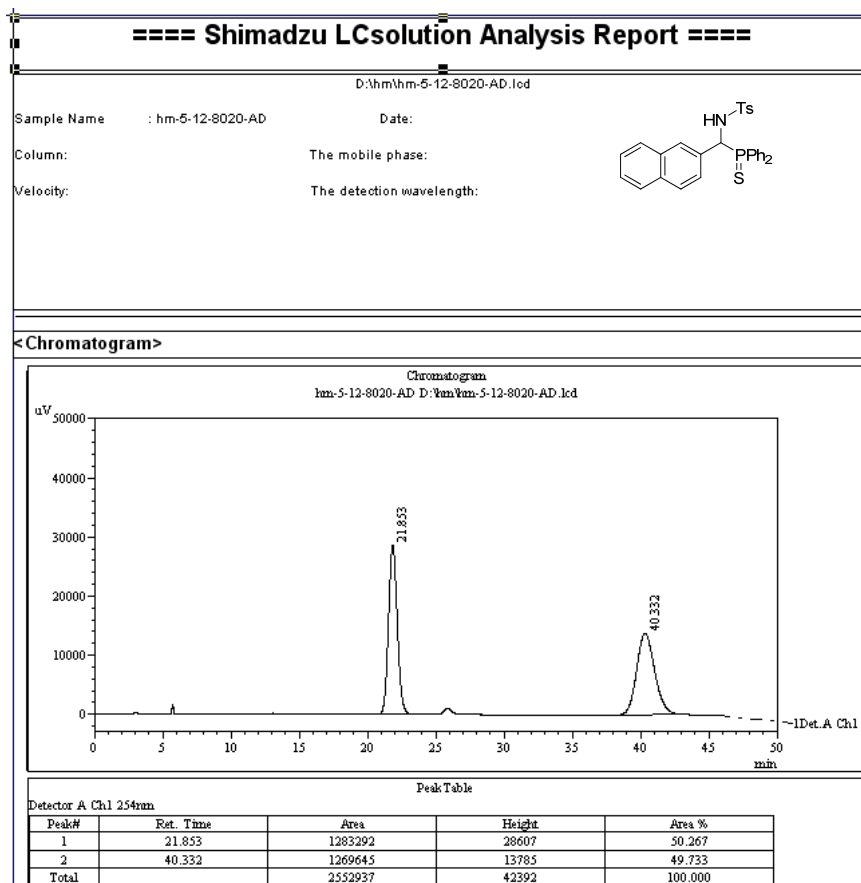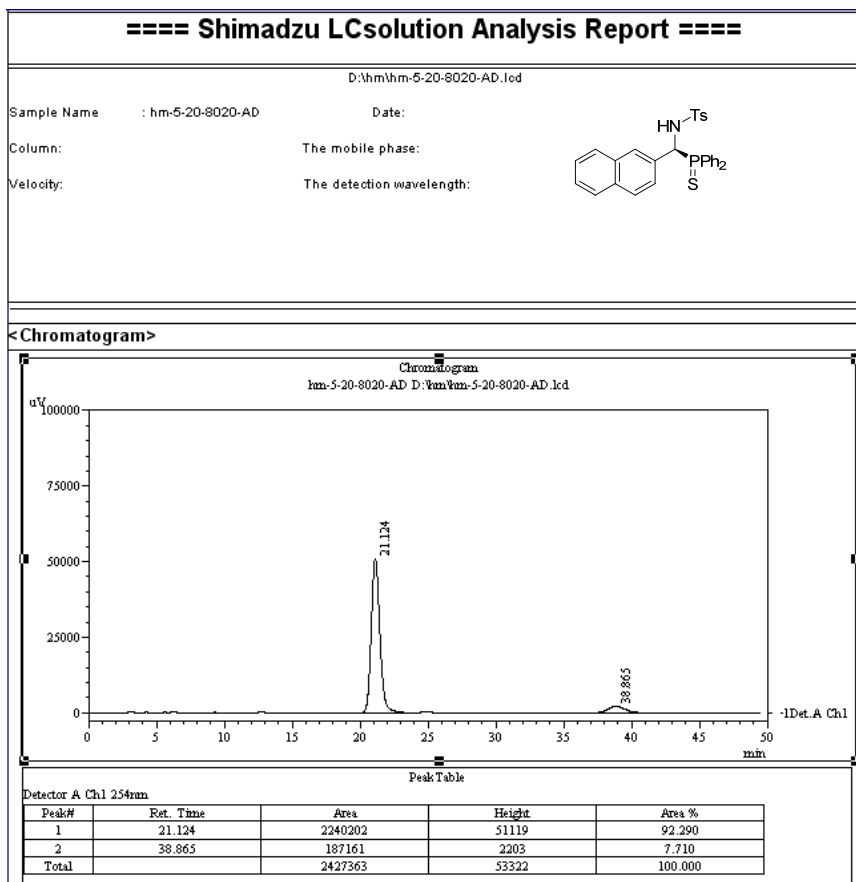

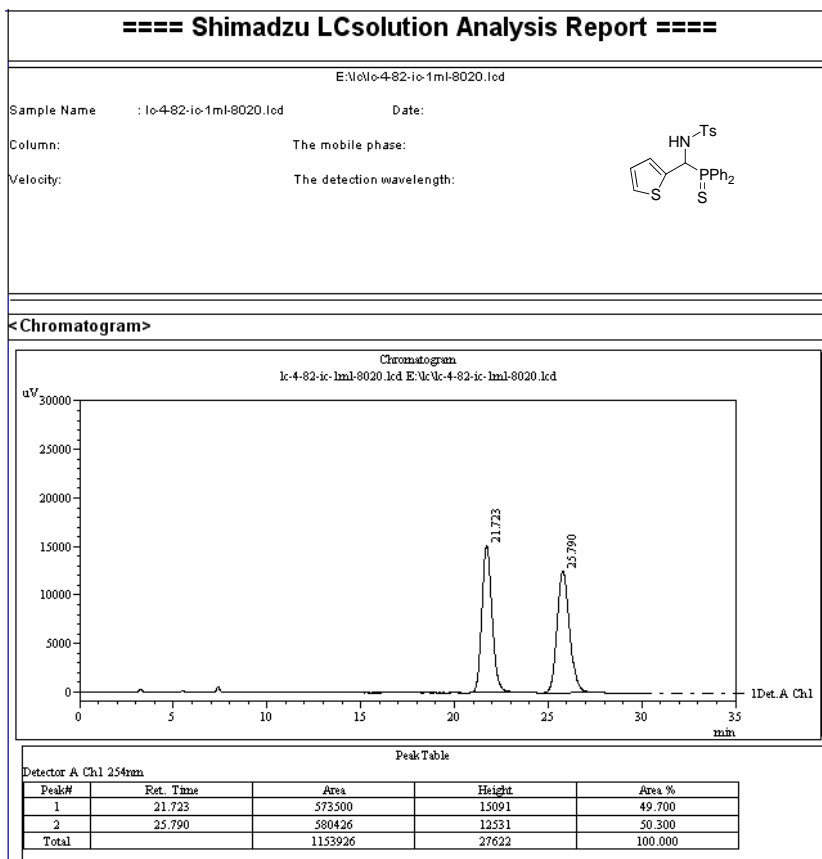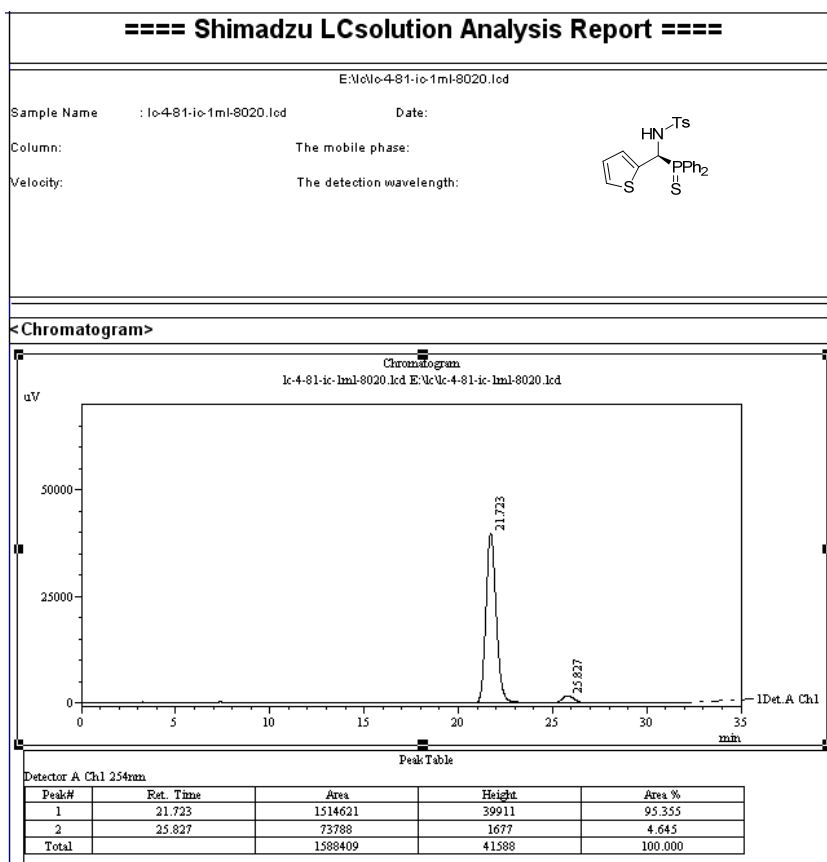

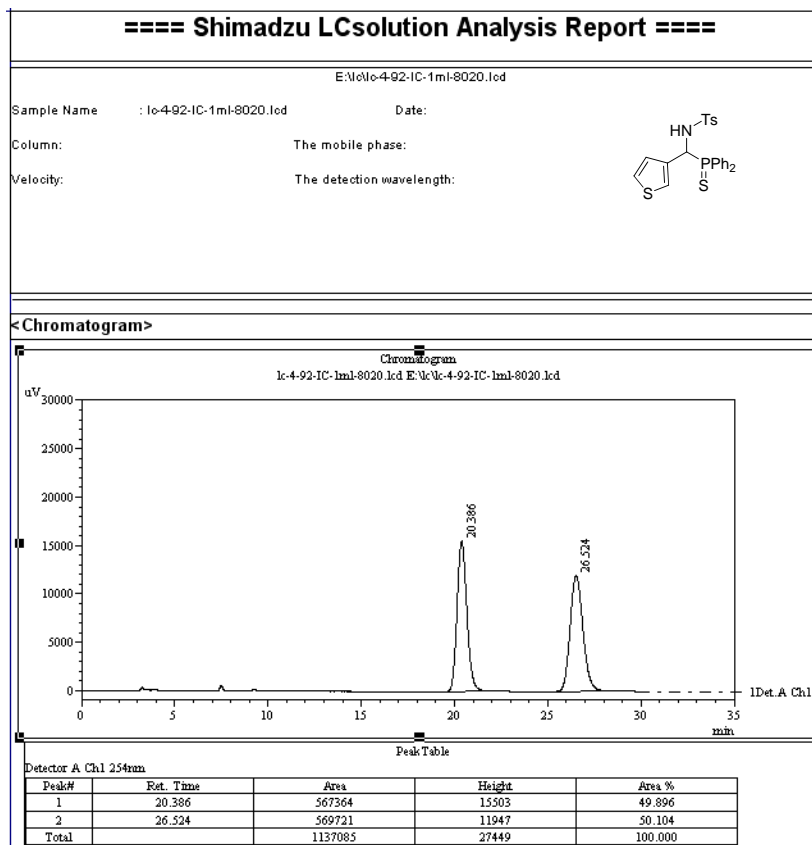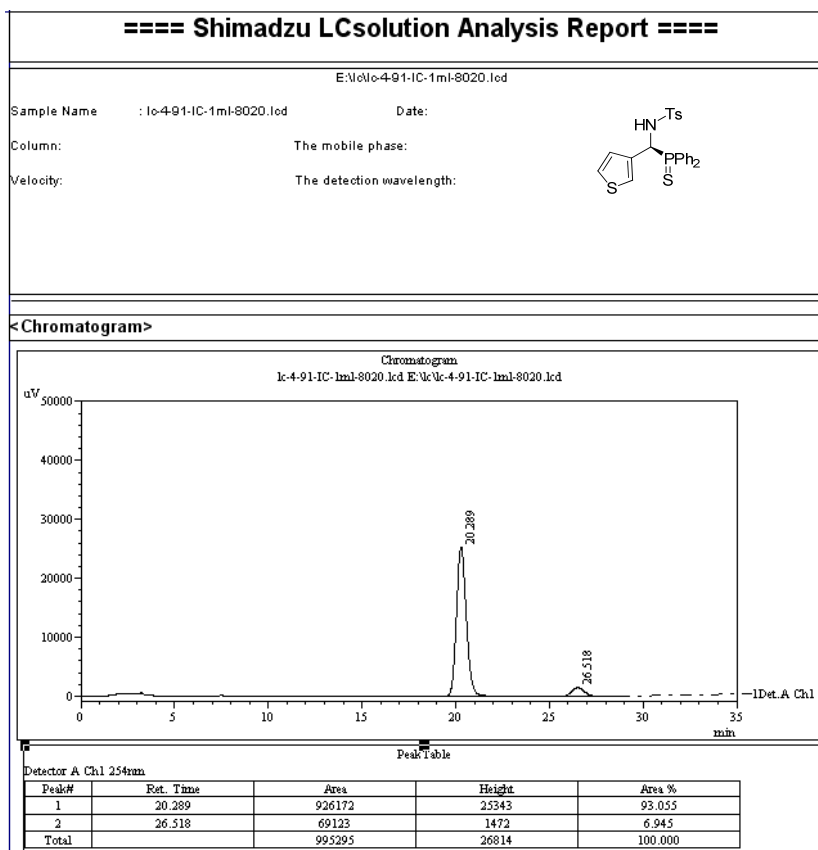



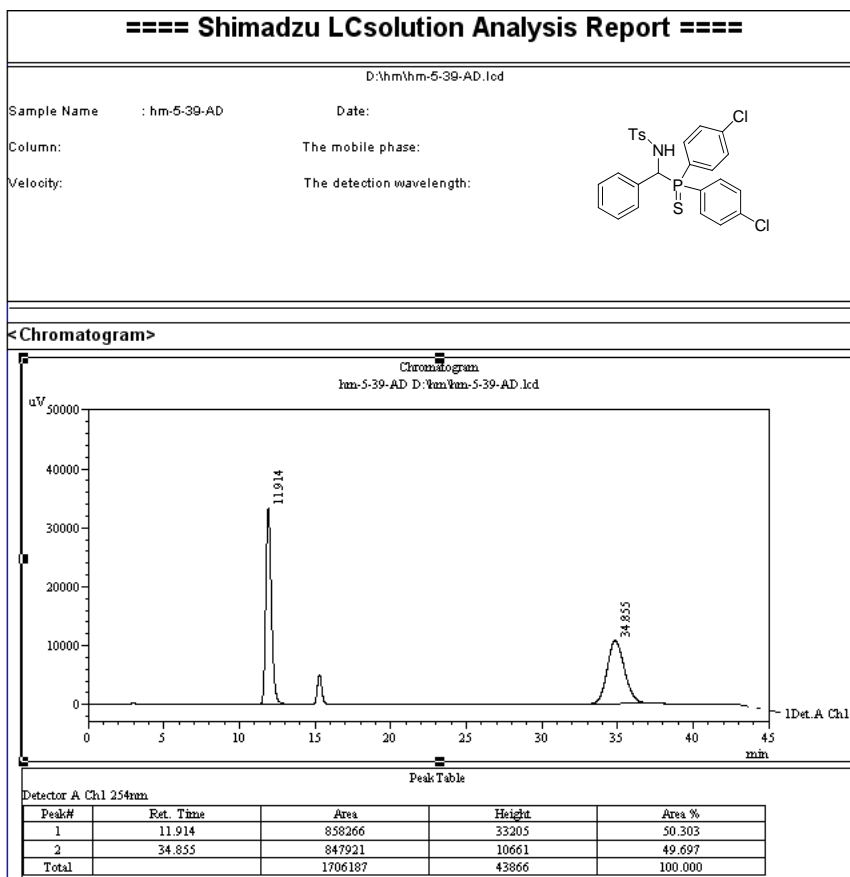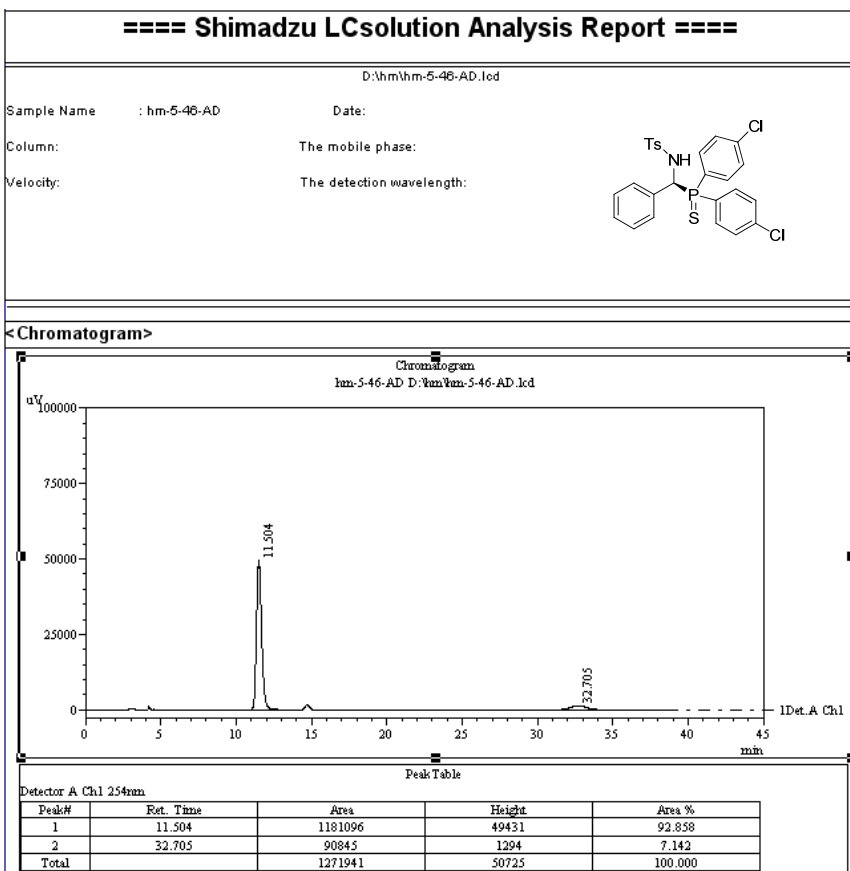

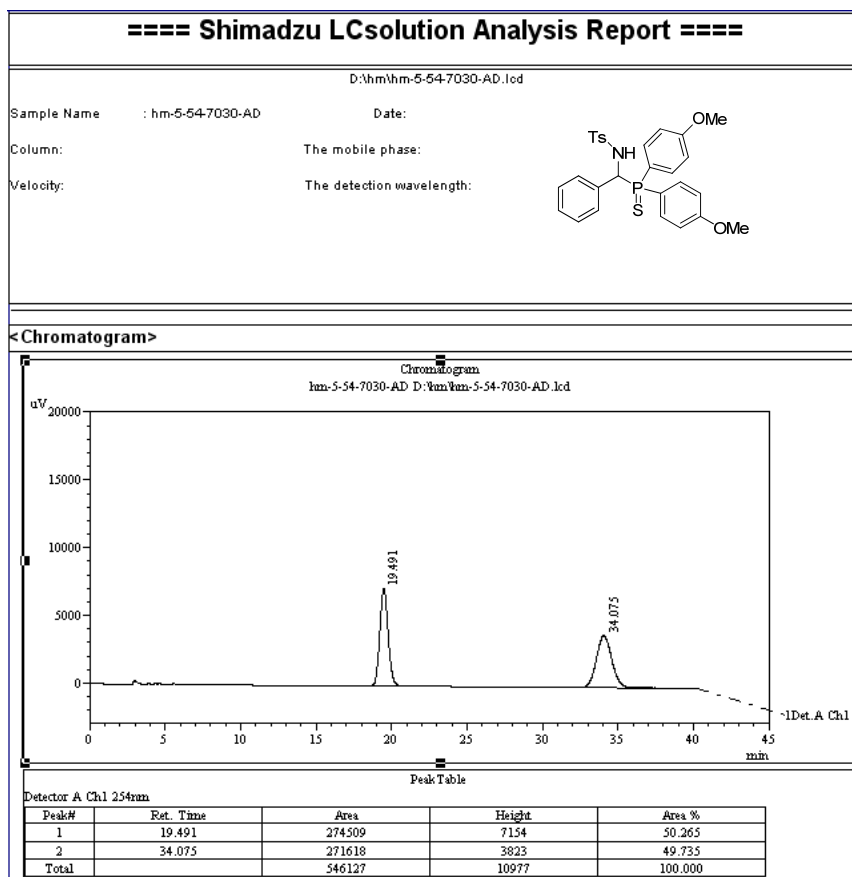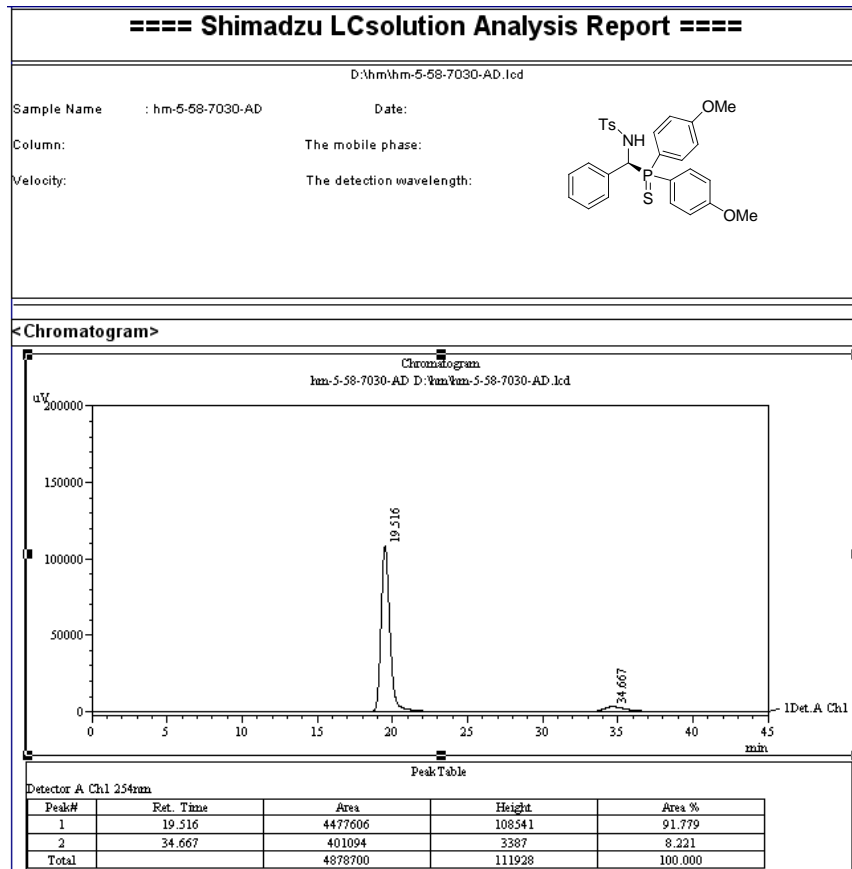

==== Shimadzu LCsolution Analysis Report ====

E:\lc\4-80-zhengque-ad-1ml-8020.lcd  
 Sample Name : lc-4-80-zhengque-ad-1ml-8020.lcd Date:  
 Column: The mobile phase:  
 Velocity: The detection wavelength:  
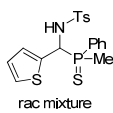  
 rac mixture

<Chromatogram>

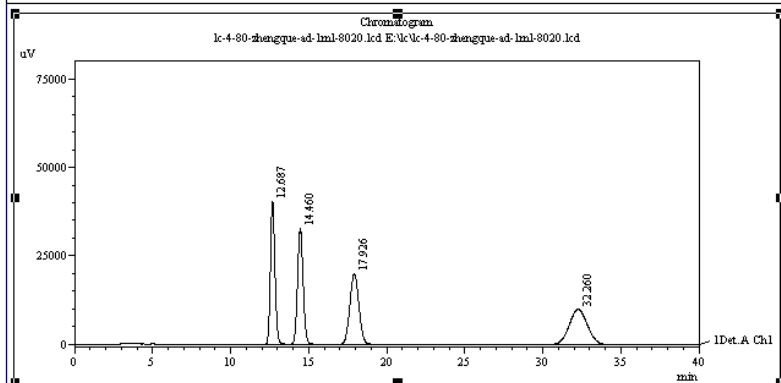

Detector A Ch1 254nm

| Peak# | Ret. Time | Area    | Height | Area %  |
|-------|-----------|---------|--------|---------|
| 1     | 12.687    | 815674  | 40397  | 25.204  |
| 2     | 14.460    | 813349  | 32675  | 25.132  |
| 3     | 17.926    | 804827  | 19911  | 24.868  |
| 4     | 32.260    | 802489  | 9975   | 24.796  |
| Total |           | 3236338 | 102938 | 100.000 |

==== Shimadzu LCsolution Analysis Report ====

E:\lc\4-79-1dian-ad-1ml-8020.lcd  
 Sample Name : lc-4-79-1dian-ad-1ml-8020.lcd Date:  
 Column: The mobile phase:  
 Velocity: The detection wavelength:  
  
 minor diastereomer

<Chromatogram>

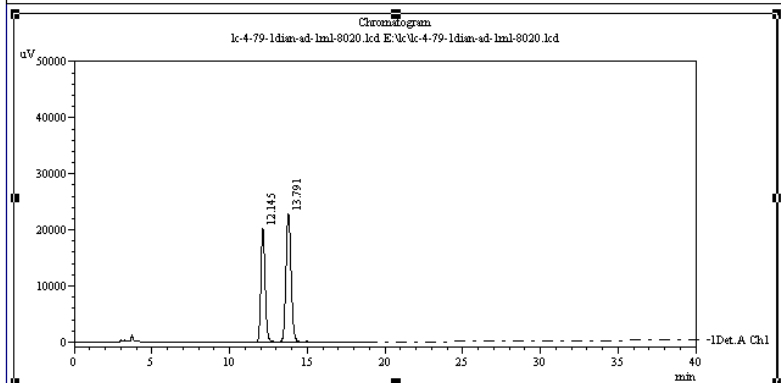

Detector A Ch1 254nm

| Peak# | Ret. Time | Area   | Height | Area %  |
|-------|-----------|--------|--------|---------|
| 1     | 12.145    | 383283 | 20170  | 42.186  |
| 2     | 13.791    | 525264 | 22783  | 57.814  |
| Total |           | 908547 | 42953  | 100.000 |
